# Supplementary material
Source: PubMed Central journal article supplement (PMC3558947)

## ABL1

Expected cleavage peaks: 170 bp, 203 bp  
Observed cleavage peaks: 163 bp, 197 bp  
Fraction cleaved: 28.5%  
Estimated % NHEJ: 15.5%

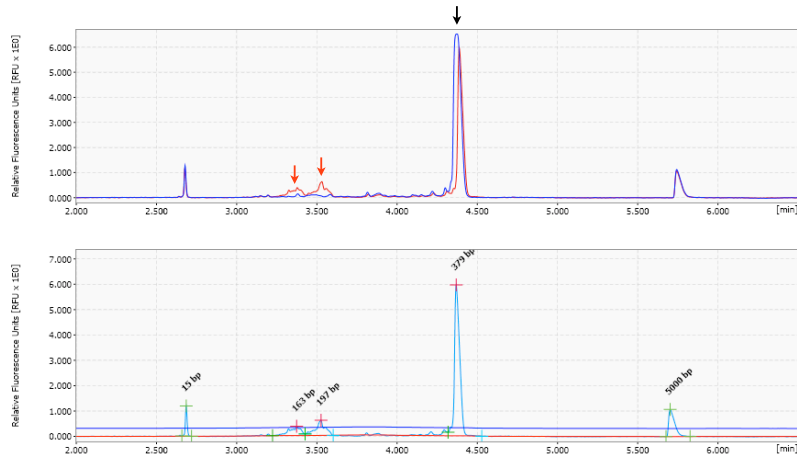

## AKT2

Expected cleavage peaks: 191 bp, 377 bp  
Observed cleavage peaks: 187 bp, 379 bp  
Fraction cleaved: 38.2%  
Estimated % NHEJ: 21.4%

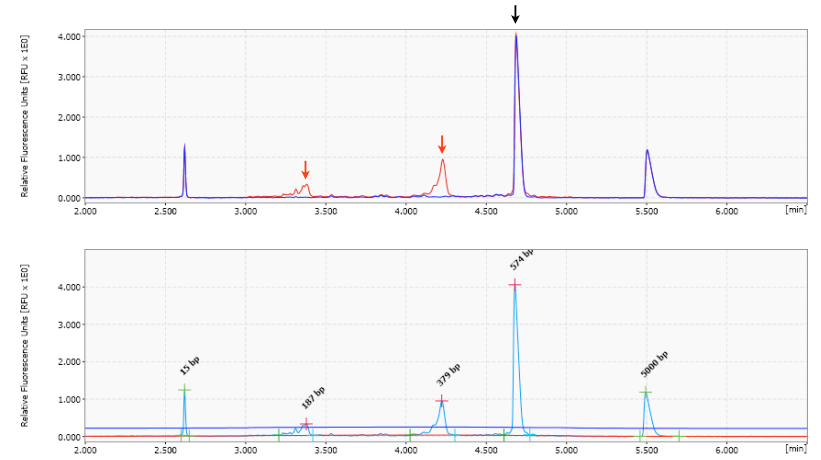

## ALK

Expected cleavage peaks: 273 bp, 411 bp  
Observed cleavage peaks: 266 bp, 409 bp  
Fraction cleaved: 18.6%  
Estimated % NHEJ: 9.8%

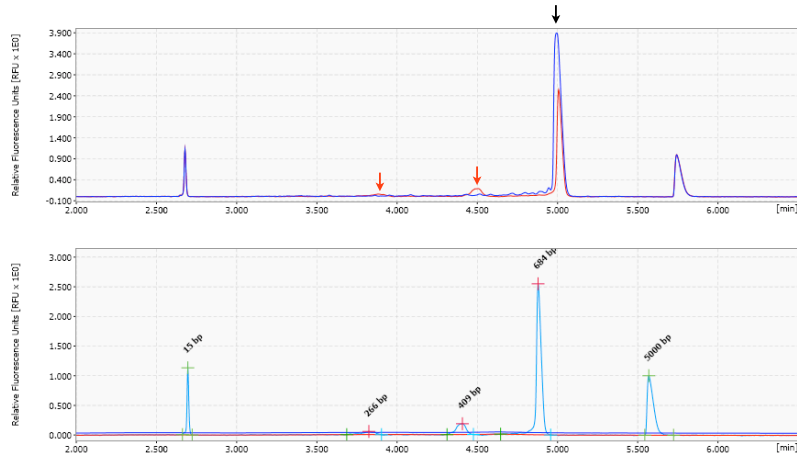

## APC

Expected cleavage peaks: 272 bp, 306 bp  
Observed cleavage peaks: 263 bp, 300 bp  
Fraction cleaved: 82.8%  
Estimated % NHEJ: 58.5%

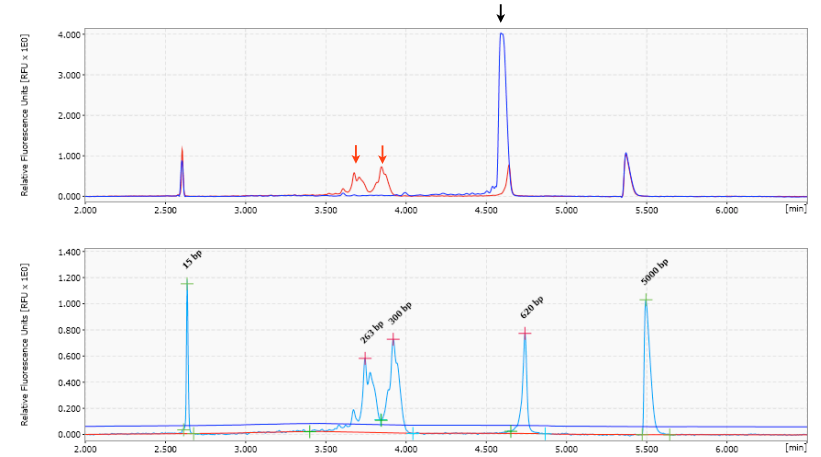

## ATM

Expected cleavage peaks: 240 bp, 477 bp  
Observed cleavage peaks: 228 bp, 467 bp  
Fraction cleaved: 76.1%  
Estimated % NHEJ: 51.1%

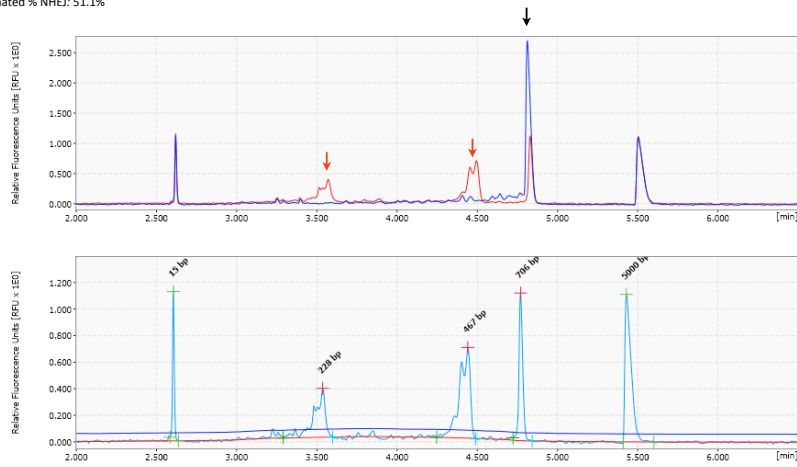

## AXIN2

Expected cleavage peaks: 258 bp, 323 bp  
Observed cleavage peaks: 256 bp, 325 bp  
Fraction cleaved: 6.0%  
Estimated % NHEJ: 3.1%

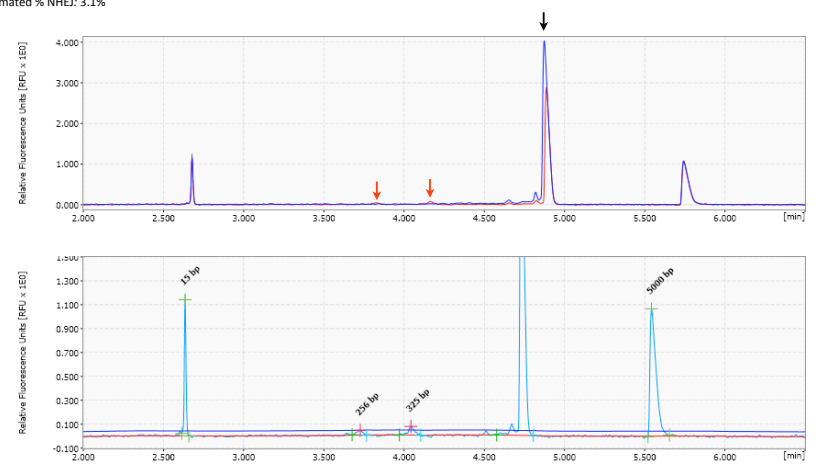

## BAX

Expected cleavage peaks: 192 bp, 391 bp  
Observed cleavage peaks: 177 bp, 397 bp  
Fraction cleaved: 5.9%  
Estimated % NHEJ: 3.0%

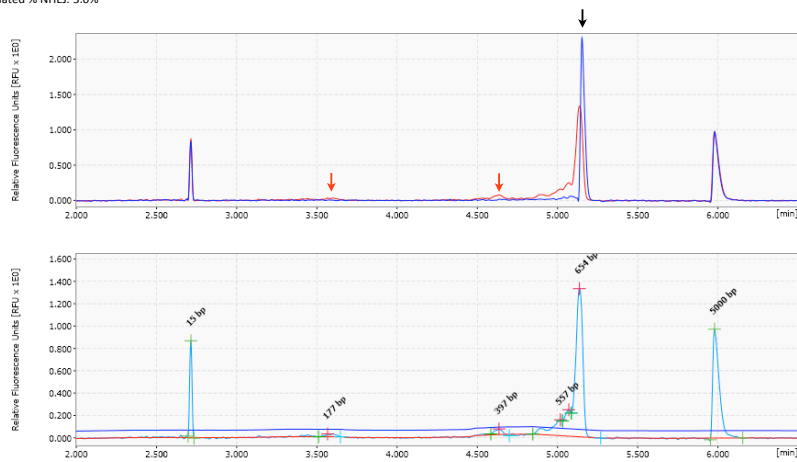

## BCL6

Expected cleavage peaks: 242 bp, 433 bp  
Observed cleavage peaks: 241 bp, 439 bp  
Fraction cleaved: 17.2%  
Estimated % NHEJ: 9.0%

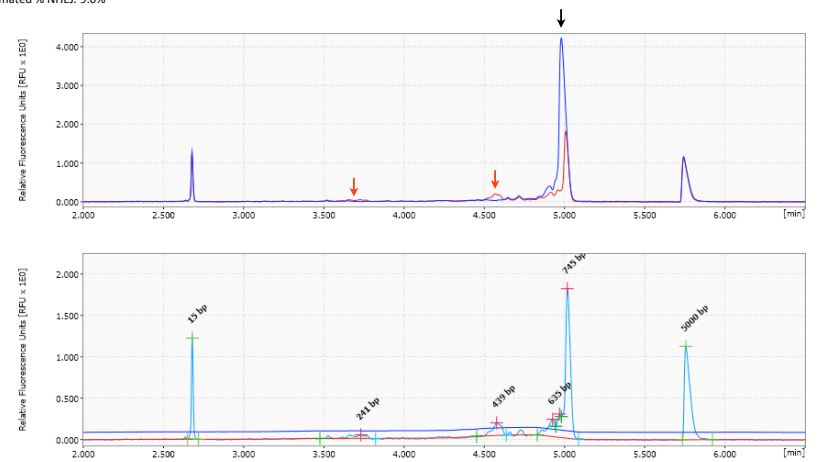

## BMPR1A

Expected cleavage peaks: 250 bp, 400 bp  
Observed cleavage peaks: 220 bp, 387 bp  
Fraction cleaved: 89.0%  
Estimated % NHEJ: 66.8%

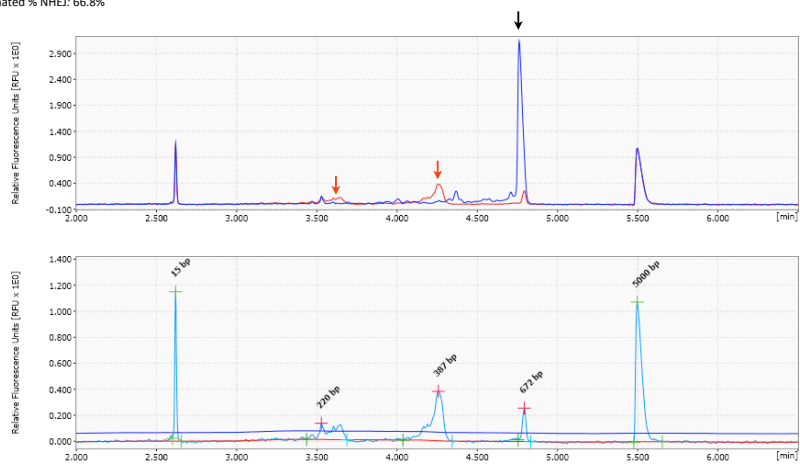

## BRCA1

Expected cleavage peaks: 232 bp, 452 bp  
Observed cleavage peaks: 222 bp, 448 bp  
Fraction cleaved: 84.0%  
Estimated % NHEJ: 60.0%

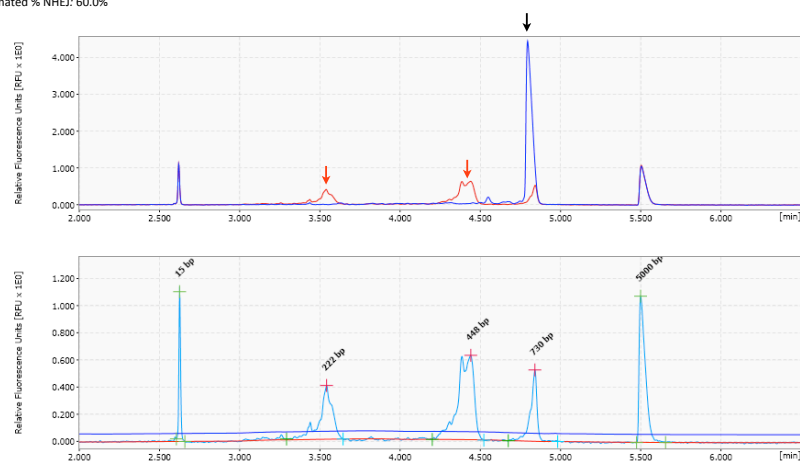

## BRCA2

Expected cleavage peaks: 332 bp, 378 bp  
Observed cleavage peaks: 331 bp, 377 bp  
Fraction cleaved: 77.0%  
Estimated % NHEJ: 52.1%

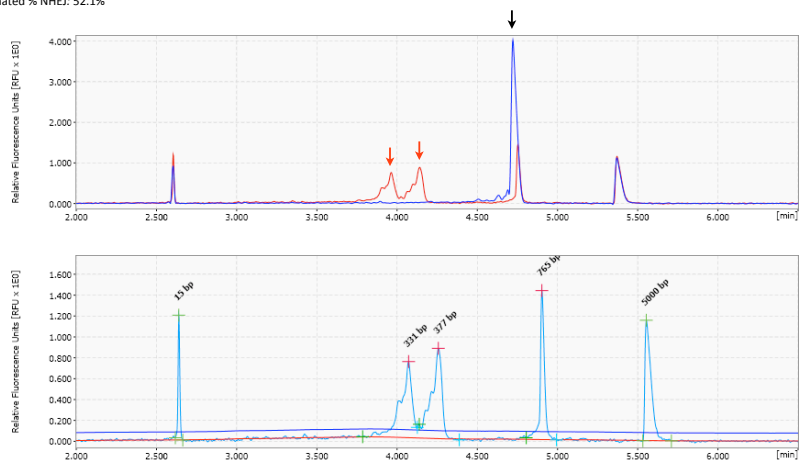

## CBX3

Expected cleavage peaks: 242 bp, 392 bp  
Observed cleavage peaks: 236 bp, 383 bp  
Fraction cleaved: 82.2%  
Estimated % NHEJ: 57.8%

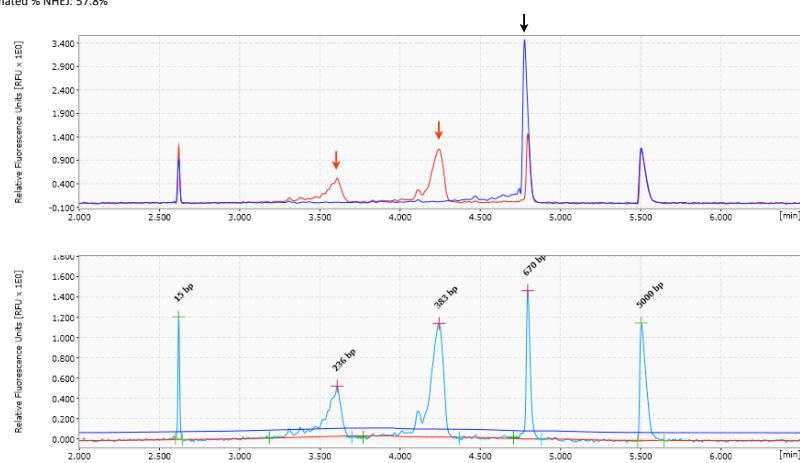

## CBX8

Expected cleavage peaks: 214 bp, 343 bp  
Observed cleavage peaks: 206 bp, 351 bp  
Fraction cleaved: 30.8%  
Estimated % NHEJ: 16.8%

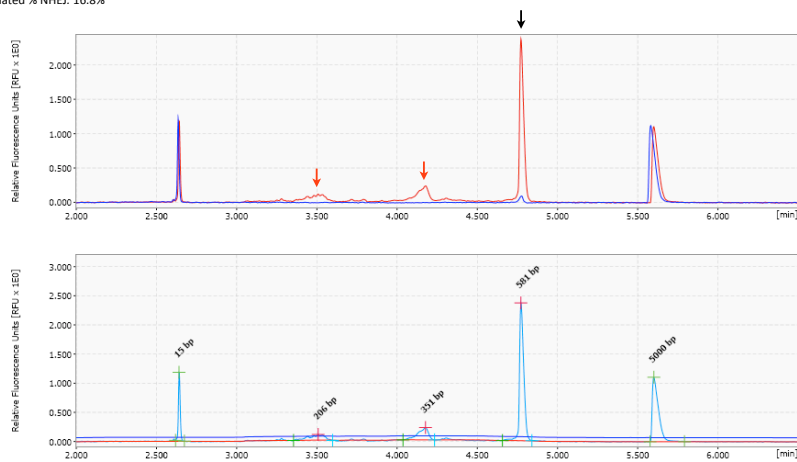

## CCND1

Expected cleavage peaks: 264 bp, 290 bp  
Observed cleavage peaks: 268 bp, 289 bp  
Fraction cleaved: 61.9%  
Estimated % NHEJ: 38.3%

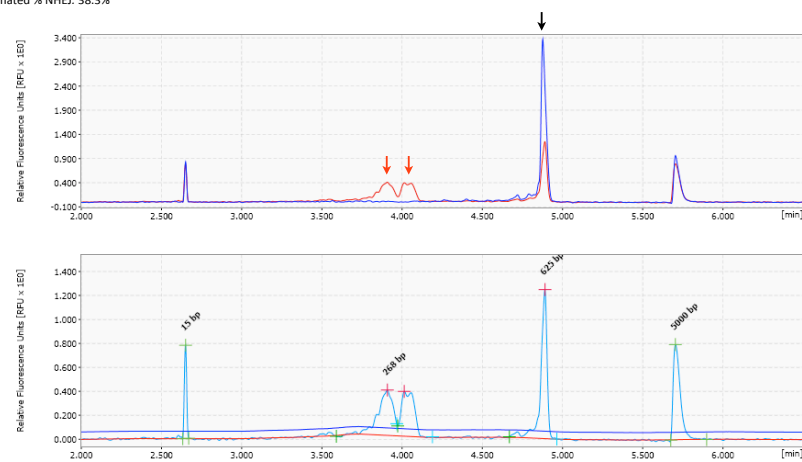

## CDC73

Expected cleavage peaks: 277 bp, 397 bp  
Observed cleavage peaks: 277 bp, 390 bp  
Fraction cleaved: 49.0%  
Estimated % NHEJ: 28.6%

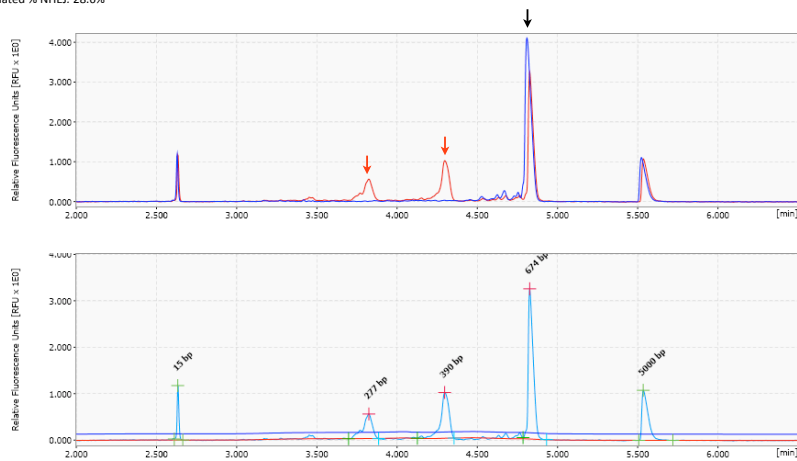

## CDH1

Expected cleavage peaks: 384 bp, 427 bp  
Observed cleavage peaks: none

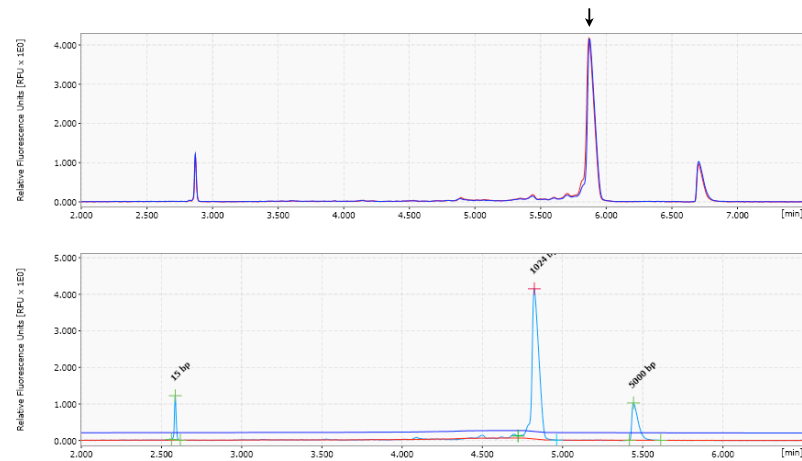

## CDK4

Expected cleavage peaks: 257 bp, 320 bp  
Observed cleavage peaks: 241 bp, 314 bp  
Fraction cleaved: 62.7%  
Estimated % NHEJ: 38.9%

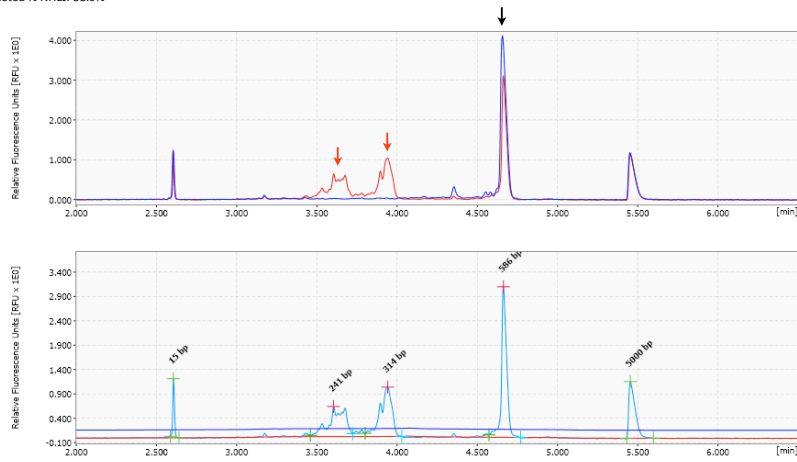

## CHD4

Expected cleavage peaks: 200 bp, 461 bp  
Observed cleavage peaks: 218 bp, 514 bp  
Fraction cleaved: 18.6%  
Estimated % NHEJ: 9.8%

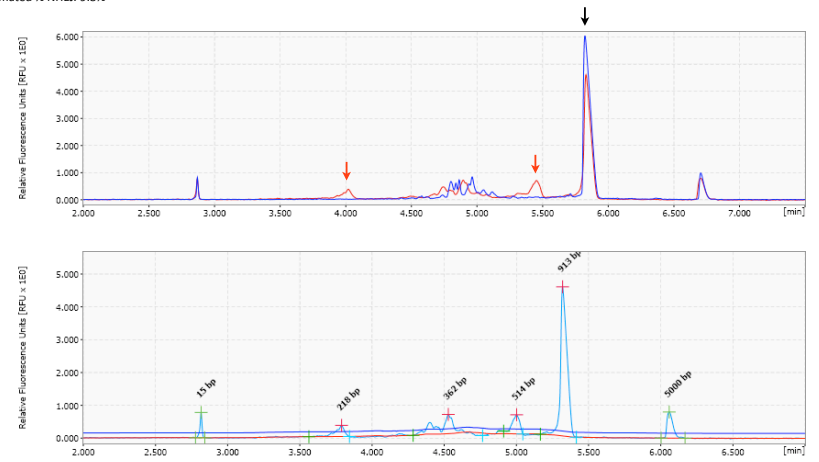

## CHD7

Expected cleavage peaks: 252 bp, 464 bp  
Observed cleavage peaks: 245 bp, 458 bp  
Fraction cleaved: 16.7%  
Estimated % NHEJ: 8.7%

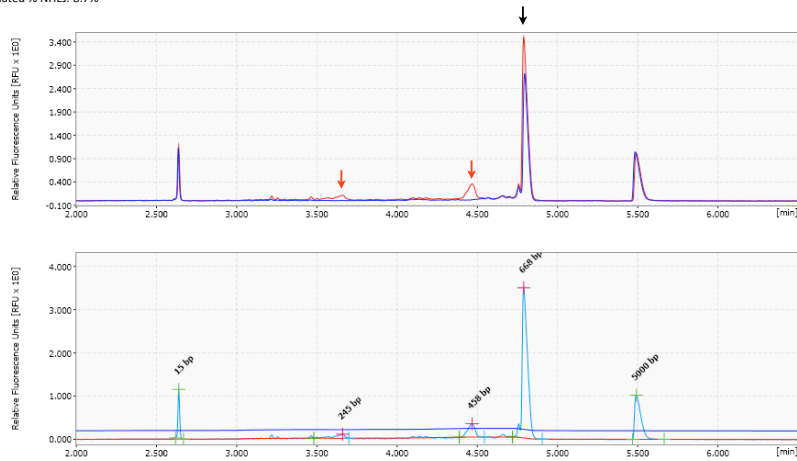

## CTNNB1

Expected cleavage peaks: 241 bp, 318 bp  
Observed cleavage peaks: 237 bp, 319 bp  
Fraction cleaved: 56.6%  
Estimated % NHEJ: 34.1%

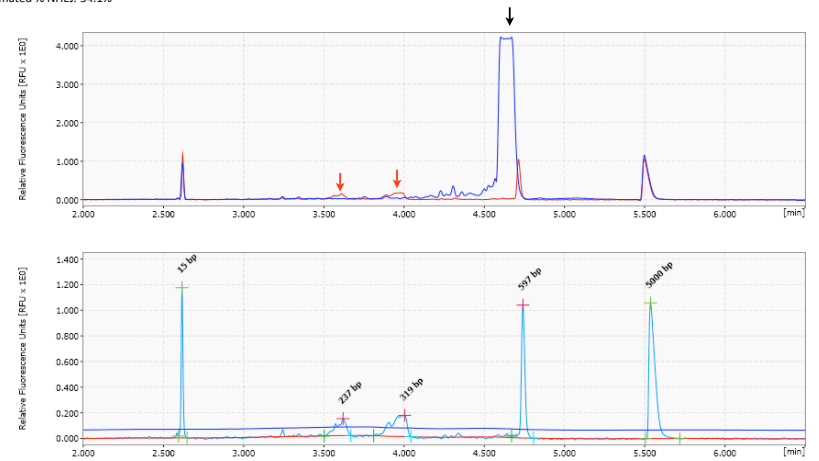

## CYLD

Expected cleavage peaks: 370 bp, 411 bp  
Observed cleavage peaks: 368 bp, 399 bp  
Fraction cleaved: 46.7%  
Estimated % NHEJ: 27.0%

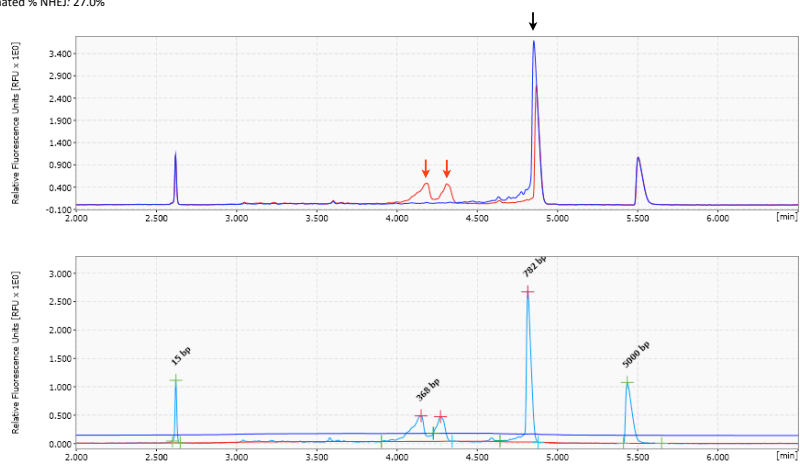

## DDB2

Expected cleavage peaks: 252 bp, 320 bp  
Observed cleavage peaks: 241 bp, 312 bp  
Fraction cleaved: 40.7%  
Estimated % NHEJ: 23.0%

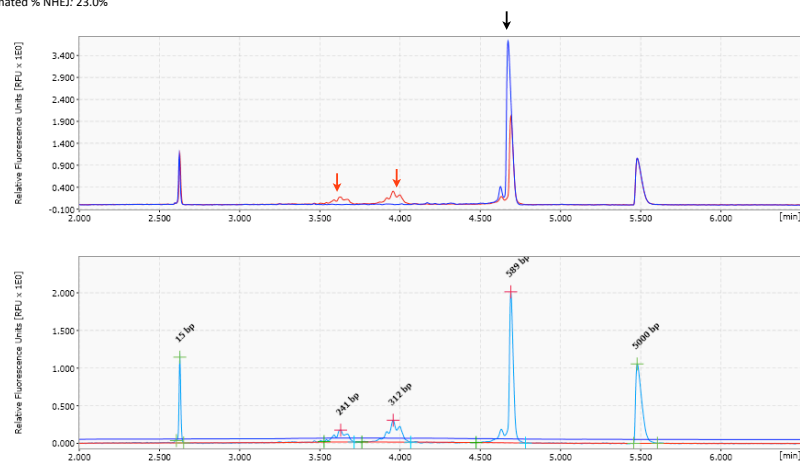

## ERCC2

Expected cleavage peaks: 250 bp, 312 bp  
Observed cleavage peaks: 239 bp, 293 bp  
Fraction cleaved: 90.1%  
Estimated % NHEJ: 68.5%

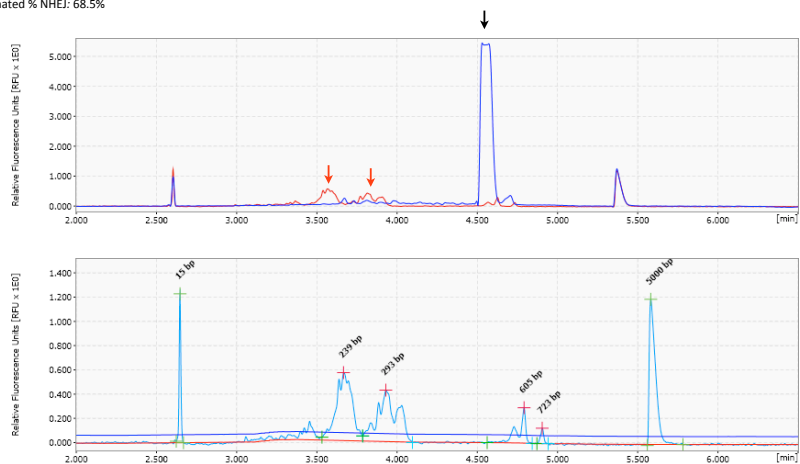

## ERCC5

Expected cleavage peaks: 101 bp, 261 bp  
Observed cleavage peaks: none

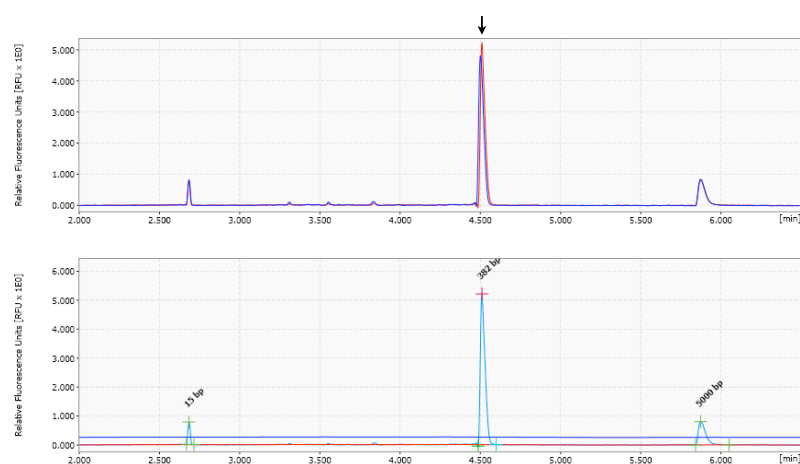

## EWSR1

Expected cleavage peaks: 243 bp, 334 bp  
Observed cleavage peaks: 228 bp, 302 bp  
Fraction cleaved: 40.0%  
Estimated % NHEJ: 22.5%

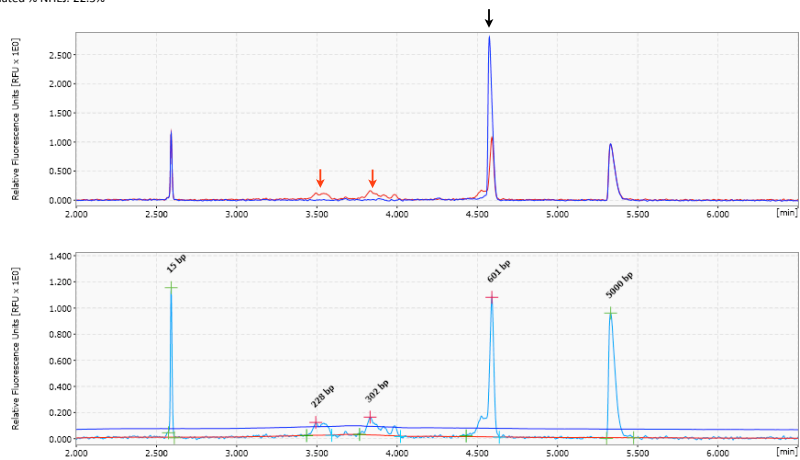

## EXT1

Expected cleavage peaks: 242 bp, 310 bp  
Observed cleavage peaks: 246 bp, 317 bp  
Fraction cleaved: 12.6%  
Estimated % NHEJ: 6.5%

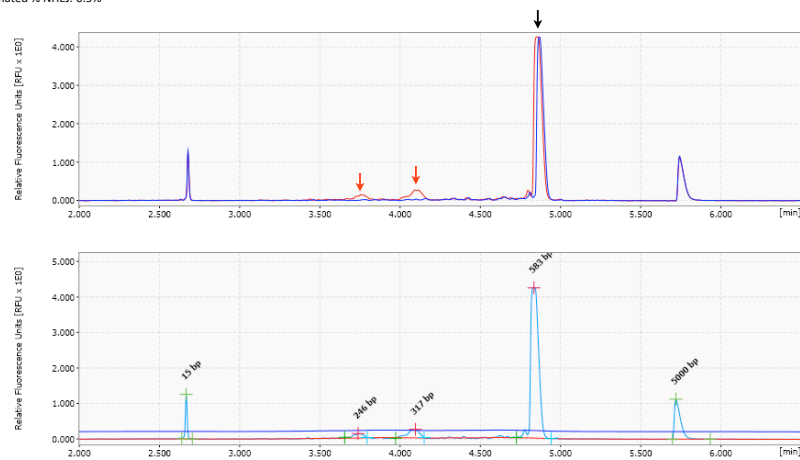

## EXT2

Expected cleavage peaks: 148 bp, 288 bp  
Observed cleavage peaks: 157 bp, 297 bp  
Fraction cleaved: 5.5%  
Estimated % NHEJ: 2.8%

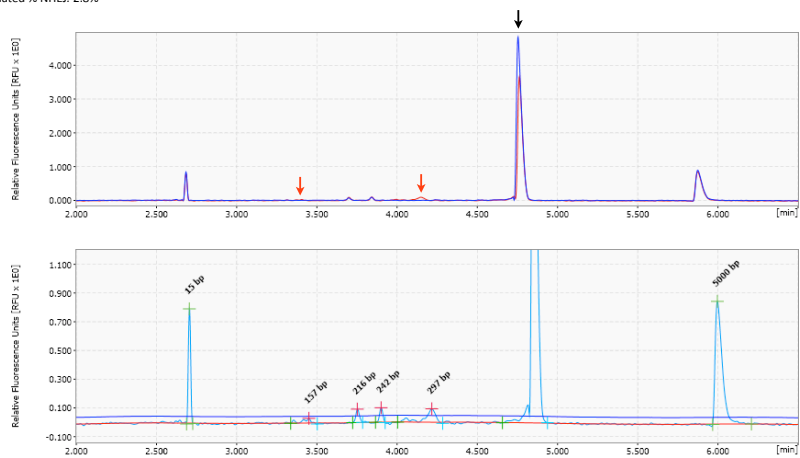

## EZH2

Expected cleavage peaks: 146 bp, 235 bp  
Observed cleavage peaks: 144 bp, 244 bp  
Fraction cleaved: 68.5%  
Estimated % NHEJ: 43.9%

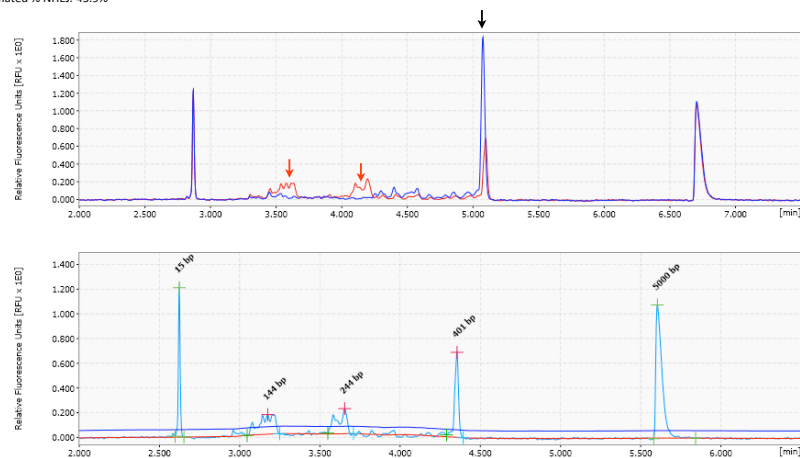

## FANCA

Expected cleavage peaks: 281 bp, 528 bp  
Observed cleavage peaks: 292 bp, 583 bp  
Fraction cleaved: 9.3%  
Estimated % NHEJ: 4.7%

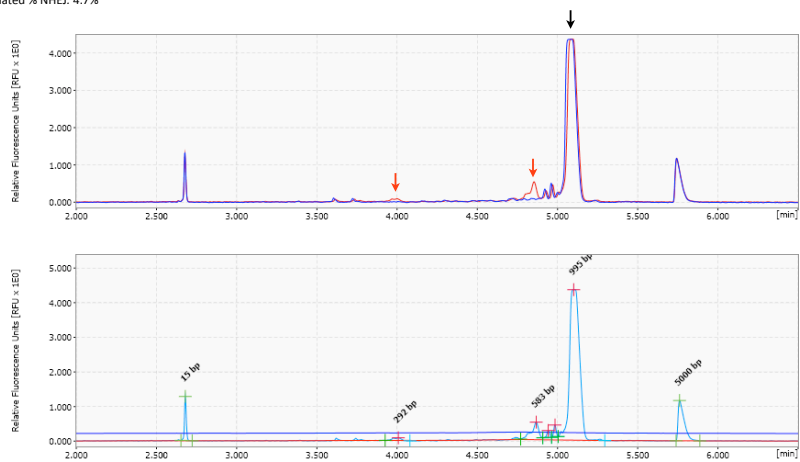

## FANCC

Expected cleavage peaks: 308 bp, 323 bp  
Observed cleavage peaks: 300 bp  
Fraction cleaved: 65.8%  
Estimated % NHEJ: 41.5%

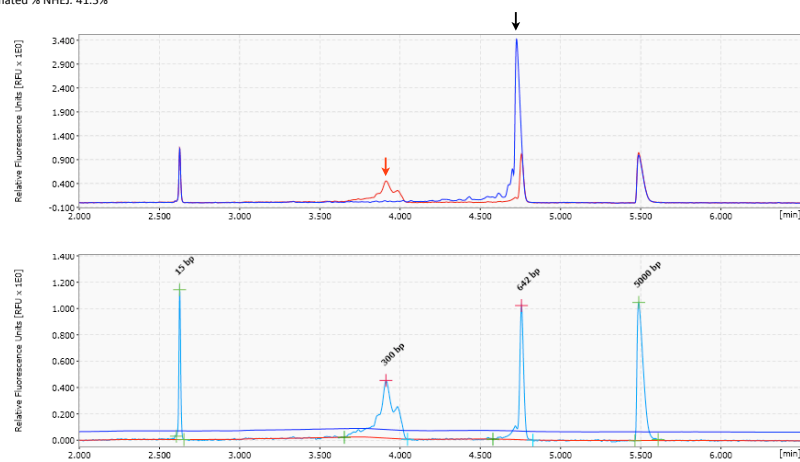

## FANCE

Expected cleavage peaks: 309 bp, 356 bp  
Observed cleavage peaks: none

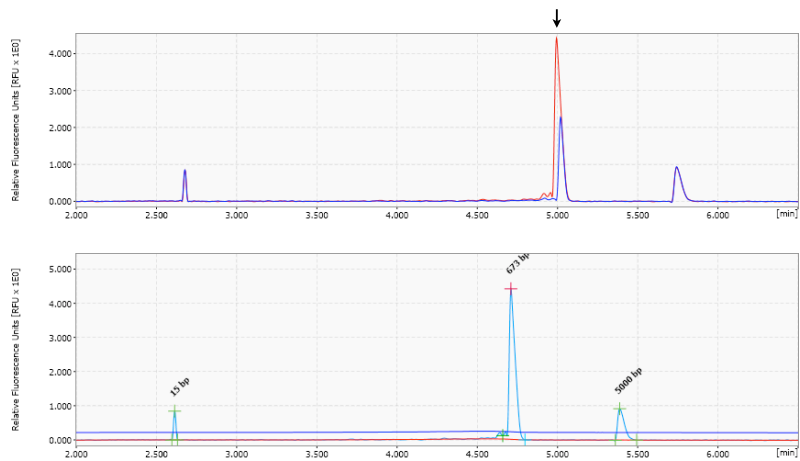

## FANCF

Expected cleavage peaks: 239 bp, 336 bp  
Observed cleavage peaks: 236 bp, 327 bp  
Fraction cleaved: 78.5%  
Estimated % NHEJ: 53.7%

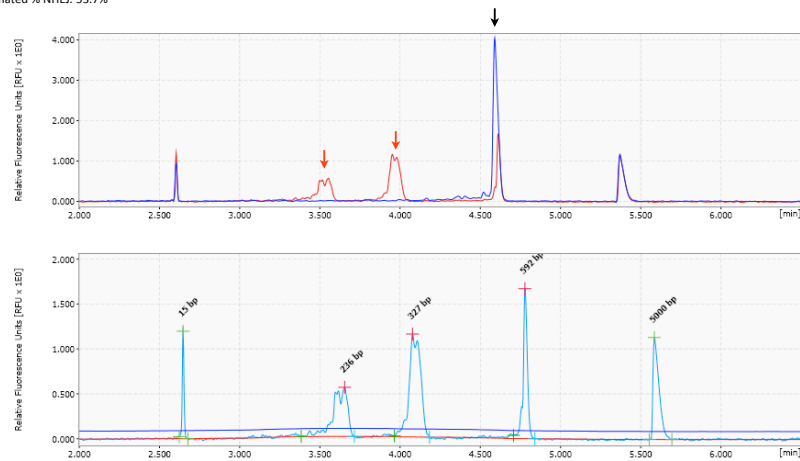



## FANCG

Expected cleavage peaks: 230 bp, 332 bp  
Observed cleavage peaks: 228 bp, 334 bp  
Fraction cleaved: 67.6%  
Estimated % NHEJ: 43.1%

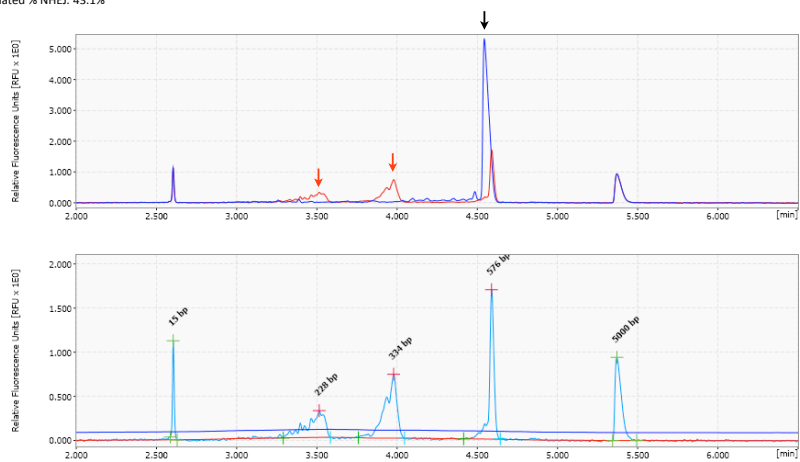

## FES

Expected cleavage peaks: 262 bp, 313 bp  
Observed cleavage peaks: 264 bp, 314 bp  
Fraction cleaved: 41.0%  
Estimated % NHEJ: 23.2%

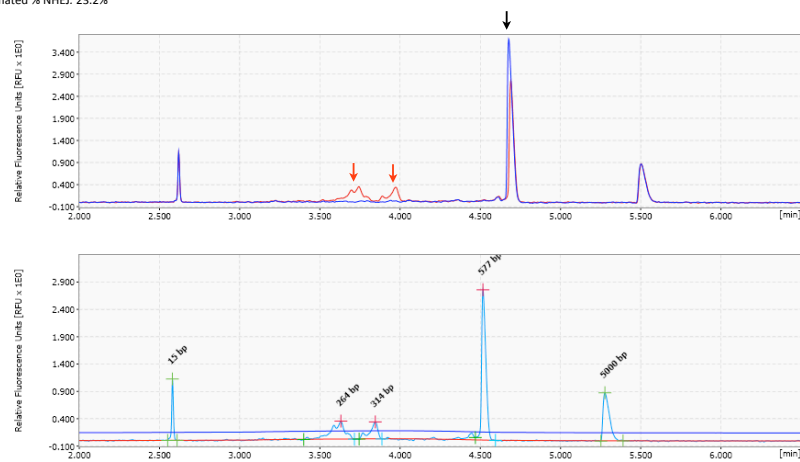

## FGFR1

Expected cleavage peaks: 267 bp, 308 bp  
Observed cleavage peaks: 265 bp, 310 bp  
Fraction cleaved: 41.7%  
Estimated % NHEJ: 23.6%

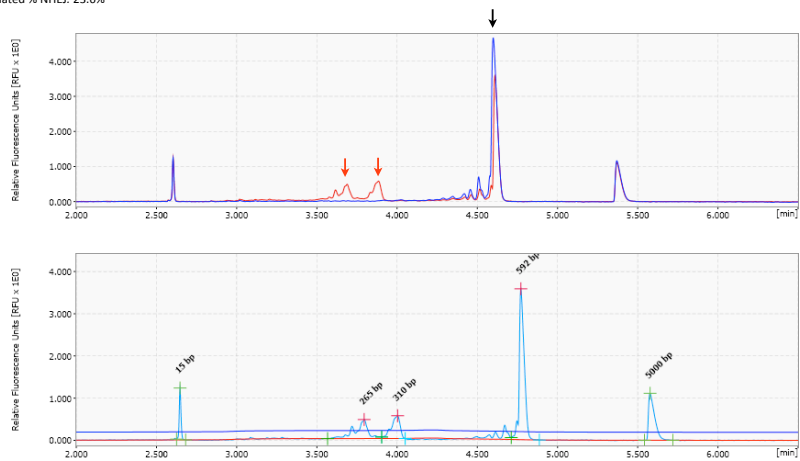

## FH

Expected cleavage peaks: 285 bp, 292 bp  
Observed cleavage peaks: 256 bp, 290 bp  
Fraction cleaved: 54.7%  
Estimated % NHEJ: 32.7%

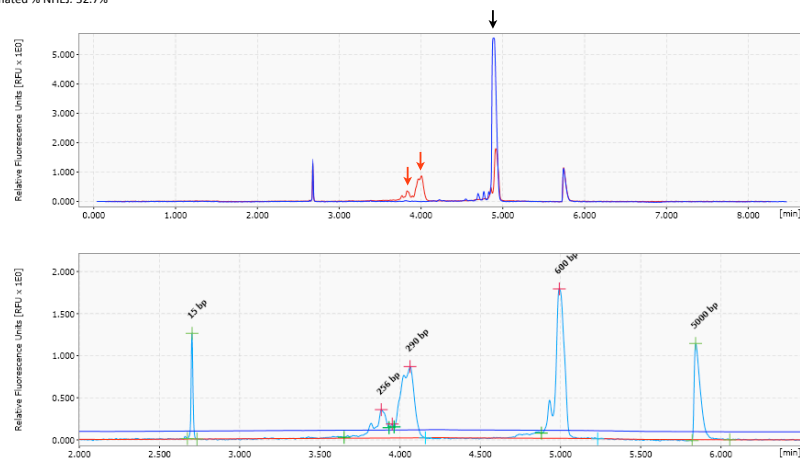

## FLCN

Expected cleavage peaks: 283 bp, 374 bp  
Observed cleavage peaks: 309 bp, 393 bp  
Fraction cleaved: 13.0%  
Estimated % NHEJ: 6.7%

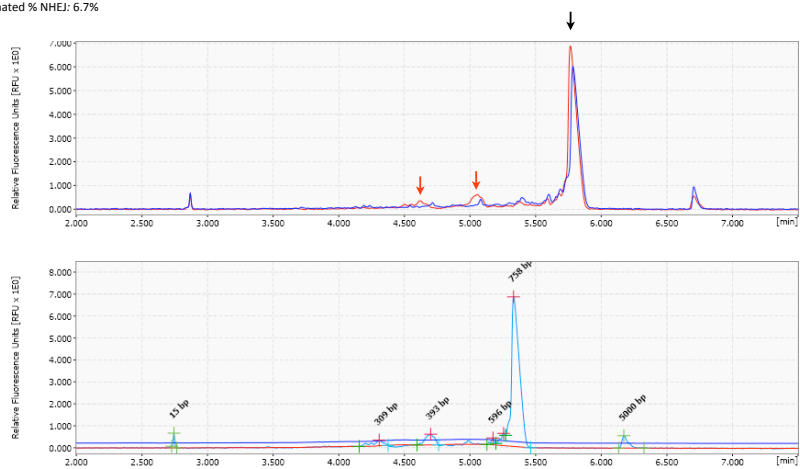

## FLT3

Expected cleavage peaks: 359 bp, 449 bp  
Observed cleavage peaks: none

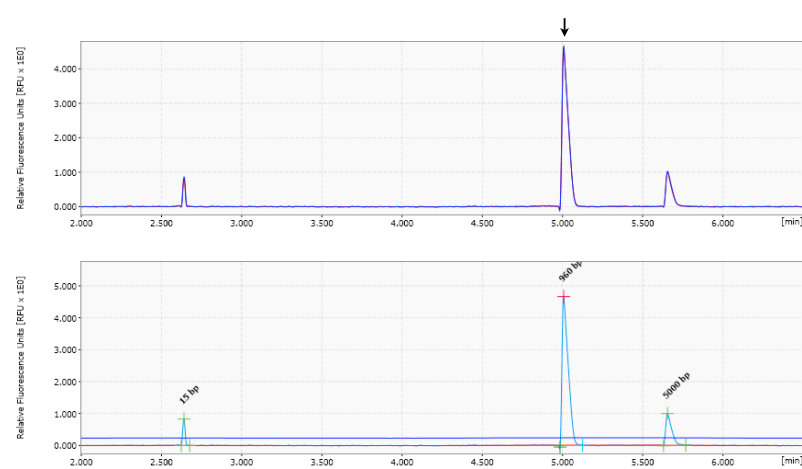

## FLT4

Expected cleavage peaks: 85 bp, 284 bp  
Observed cleavage peaks: 299 bp  
Fraction cleaved: 9.6%  
Estimated % NHEJ: 4.9%

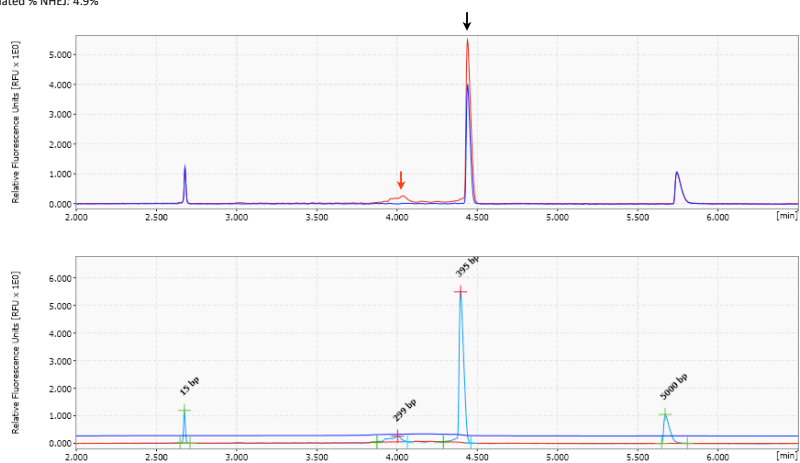

## FOXO1

Expected cleavage peaks: 307 bp, 358 bp  
Observed cleavage peaks: 311 bp, 364 bp  
Fraction cleaved: 18.2%  
Estimated % NHEJ: 9.6%

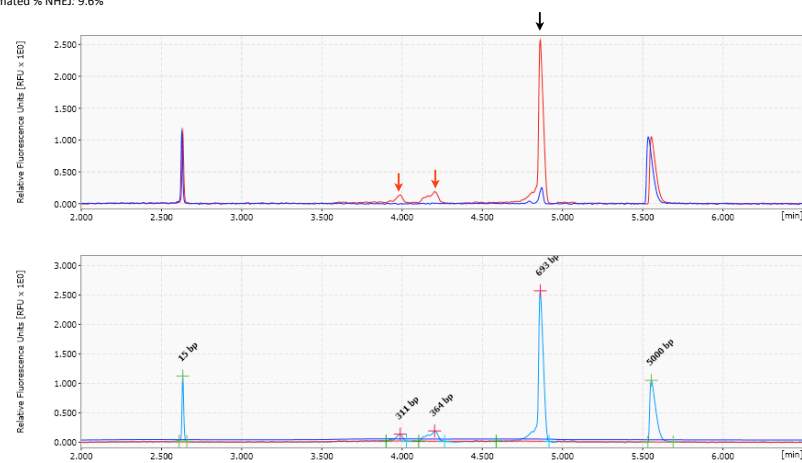

## FOXO3

Expected cleavage peaks: 277 bp, 305 bp  
Observed cleavage peaks: 287 bp, 313 bp  
Fraction cleaved: 9.7%  
Estimated % NHEJ: 5.0%

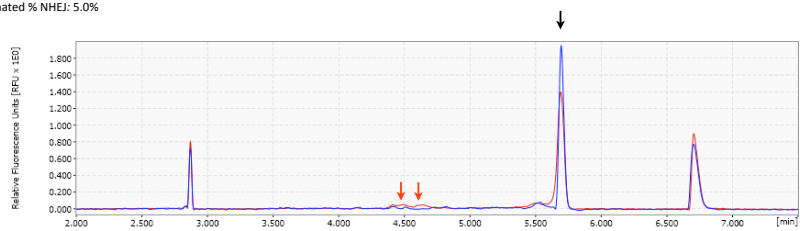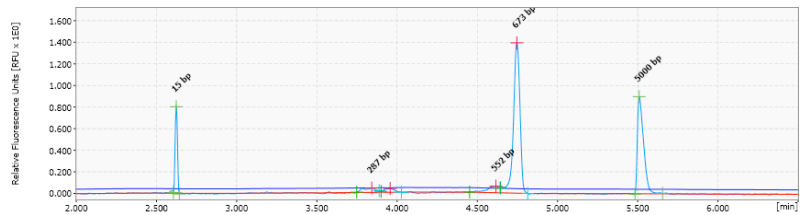

## GLI1

Expected cleavage peaks: 308 bp, 504 bp  
Observed cleavage peaks: 302 bp, 500 bp  
Fraction cleaved: 56.3%  
Estimated % NHEJ: 33.9%

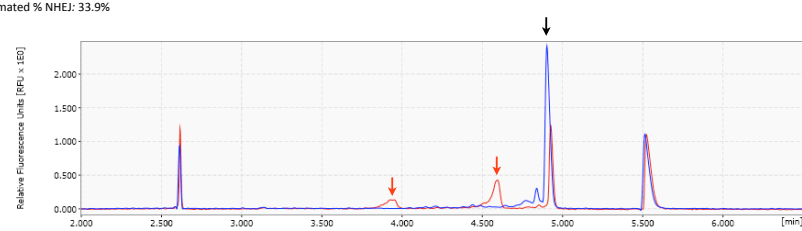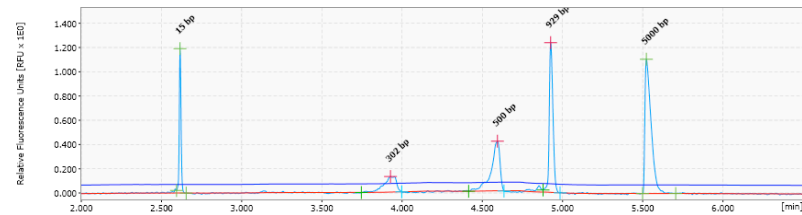

## HDAC1

Expected cleavage peaks: 209 bp, 372 bp  
Observed cleavage peaks: 201 bp, 370 bp  
Fraction cleaved: 25.6%  
Estimated % NHEJ: 13.8%

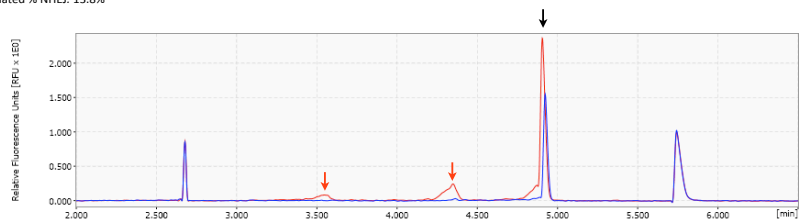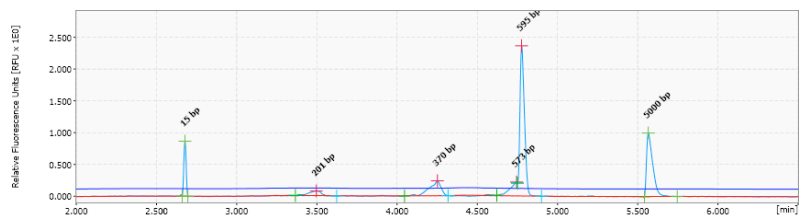

## HDAC2

Expected cleavage peaks: 274 bp, 466 bp  
Observed cleavage peaks: 306 bp, 538 bp  
Fraction cleaved: 6.5%  
Estimated % NHEJ: 3.3%

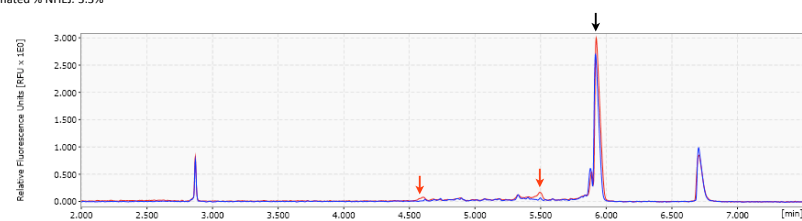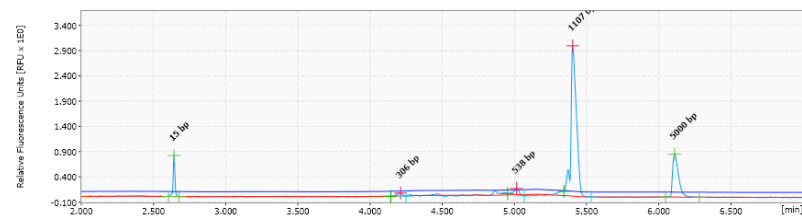

## HDAC6

Expected cleavage peaks: 213 bp, 371 bp  
Observed cleavage peaks: 200 bp, 370 bp  
Fraction cleaved: 34.9%  
Estimated % NHEJ: 19.3%

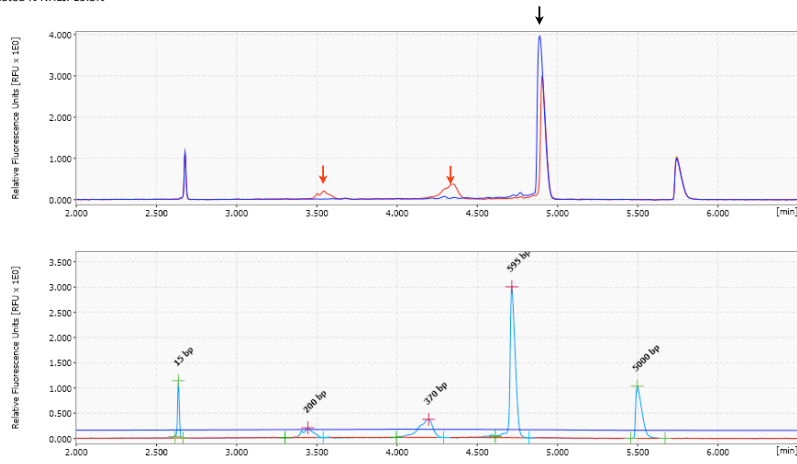

## HMGA2

Expected cleavage peaks: 406 bp, 408 bp  
Observed cleavage peaks: 419 bp  
Fraction cleaved: 3.1%  
Estimated % NHEJ: 1.6%

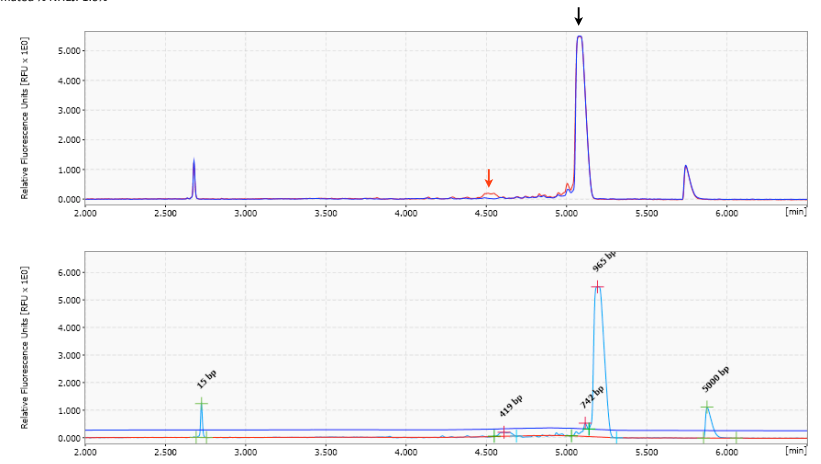

## HOXA13

Expected cleavage peaks: 283 bp, 313 bp  
Observed cleavage peaks: 292 bp, 320 bp  
Fraction cleaved: 8.8%  
Estimated % NHEJ: 4.5%

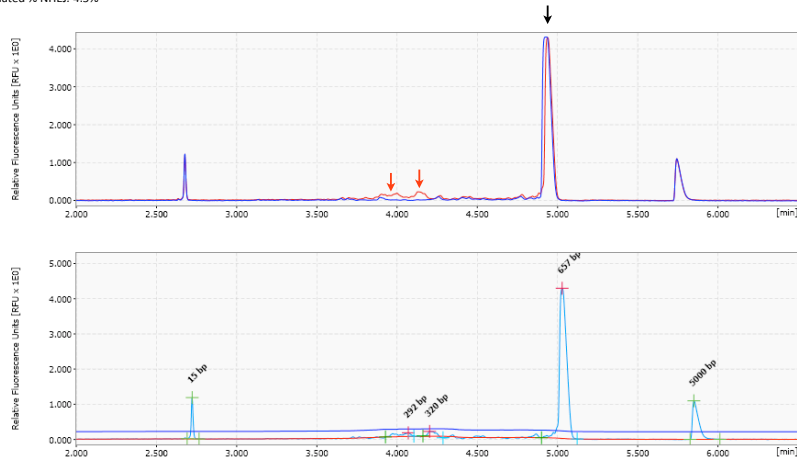

## HOXA9

Expected cleavage peaks: 283 bp, 318 bp  
Observed cleavage peaks: 246 bp, 333 bp  
Fraction cleaved: 7.2%  
Estimated % NHEJ: 3.7%

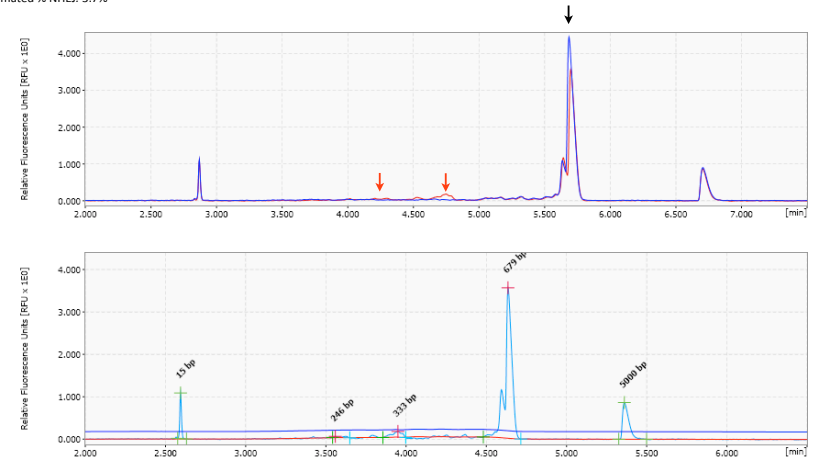

## HOXC13

Expected cleavage peaks: 346 bp, 439 bp  
Observed cleavage peaks: 359 bp, 443 bp  
Fraction cleaved: 20.6%  
Estimated % NHEJ: 10.9%

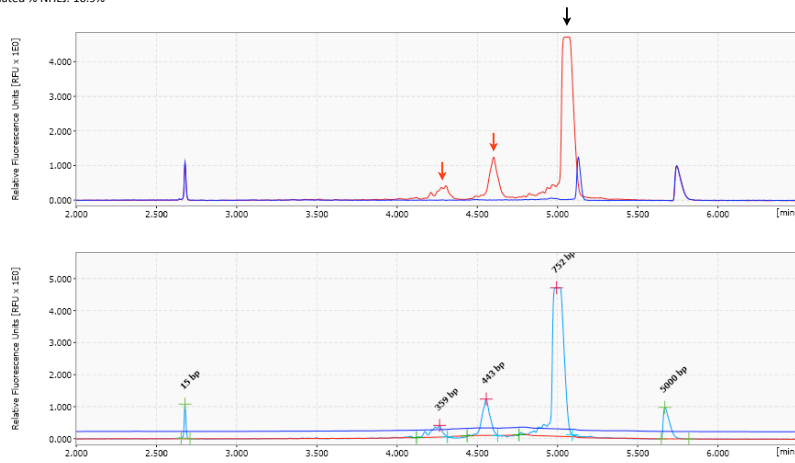

## HOXD11

Expected cleavage peaks: 315 bp, 463 bp  
Observed cleavage peaks: none

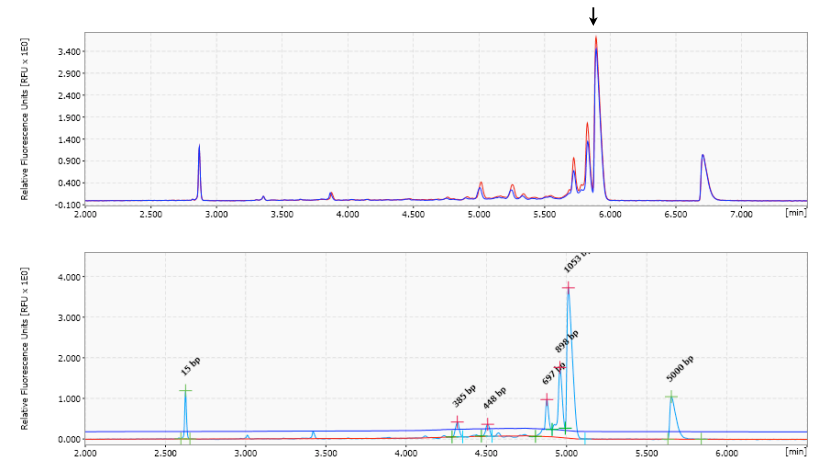

## HOXD13

Expected cleavage peaks: 264 bp, 376 bp  
Observed cleavage peaks: none

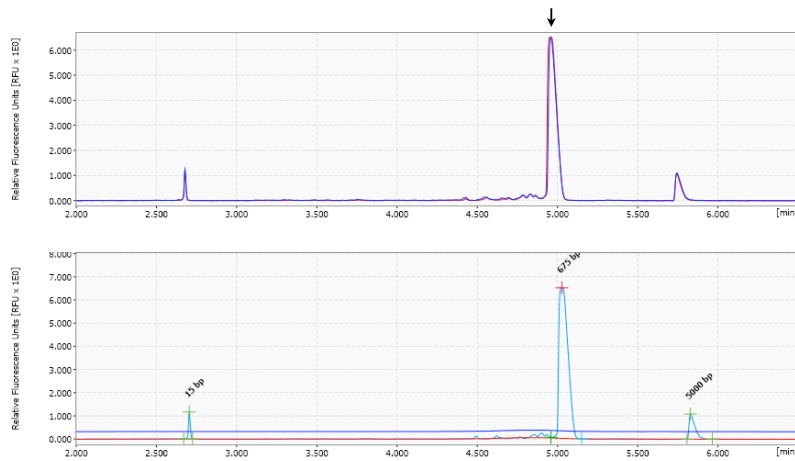

## JAK2

Expected cleavage peaks: 334 bp, 441 bp  
Observed cleavage peaks: 332 bp, 431 bp  
Fraction cleaved: 85.4%  
Estimated % NHEJ: 61.8%

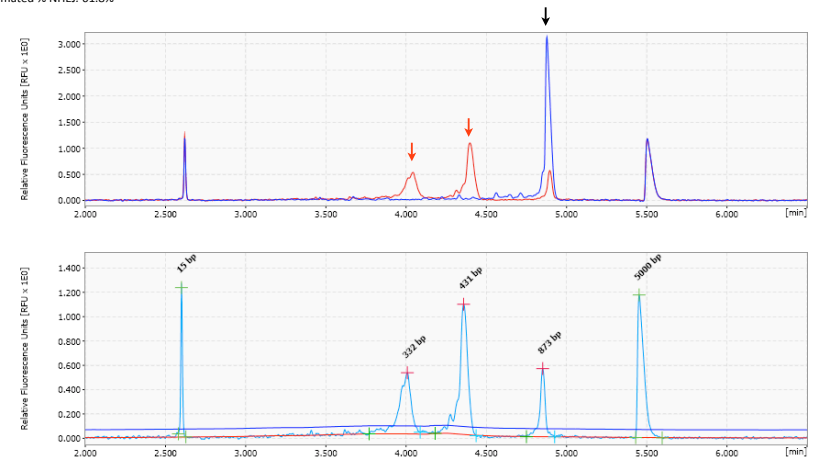

## KIT

Expected cleavage peaks: 235 bp, 316 bp  
Observed cleavage peaks: none

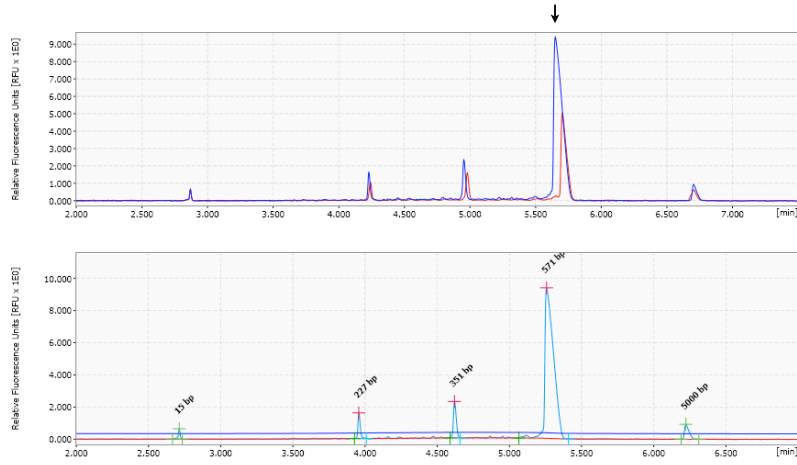

## KRAS

Expected cleavage peaks: 245 bp, 297 bp  
Observed cleavage peaks: 241 bp, 287 bp  
Fraction cleaved: 19.6%  
Estimated % NHEJ: 10.3%

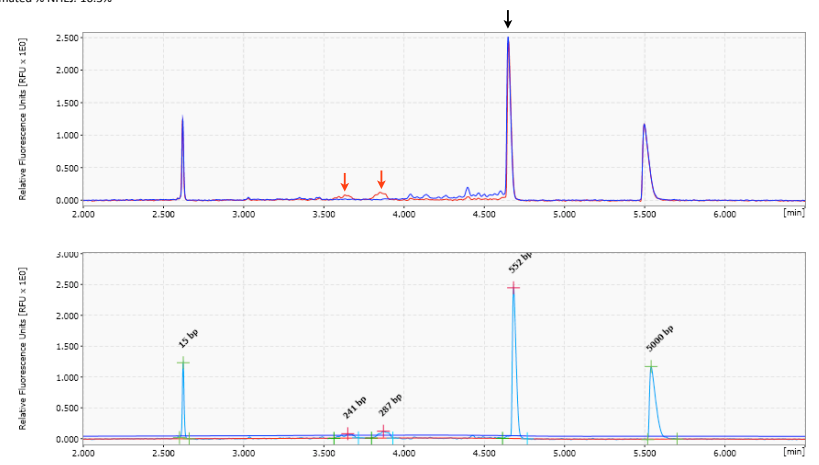

## MAP2K4

Expected cleavage peaks: 268 bp, 468 bp  
Observed cleavage peaks: 263 bp, 480 bp  
Fraction cleaved: 9.5%  
Estimated % NHEJ: 4.8%

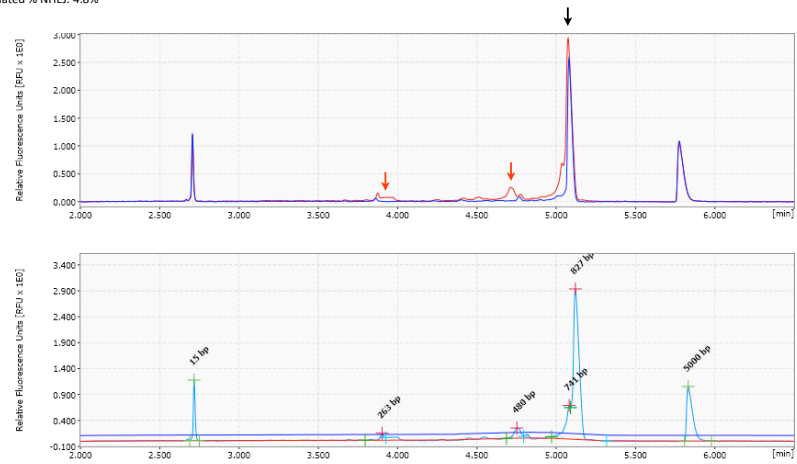

## MDM2

Expected cleavage peaks: 246 bp, 336 bp  
Observed cleavage peaks: 244 bp, 341 bp  
Fraction cleaved: 23.9%  
Estimated % NHEJ: 12.8%

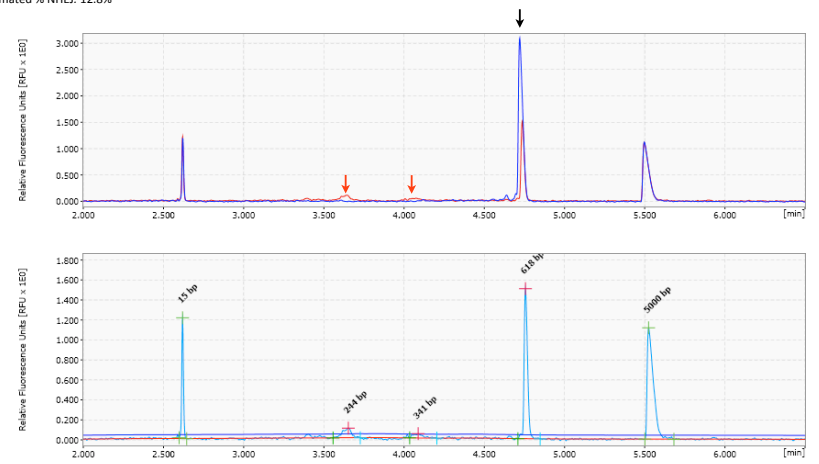

## MET

Expected cleavage peaks: 383 bp, 526 bp  
Observed cleavage peaks: 379 bp, 499 bp  
Fraction cleaved: 76.1%  
Estimated % NHEJ: 51.1%

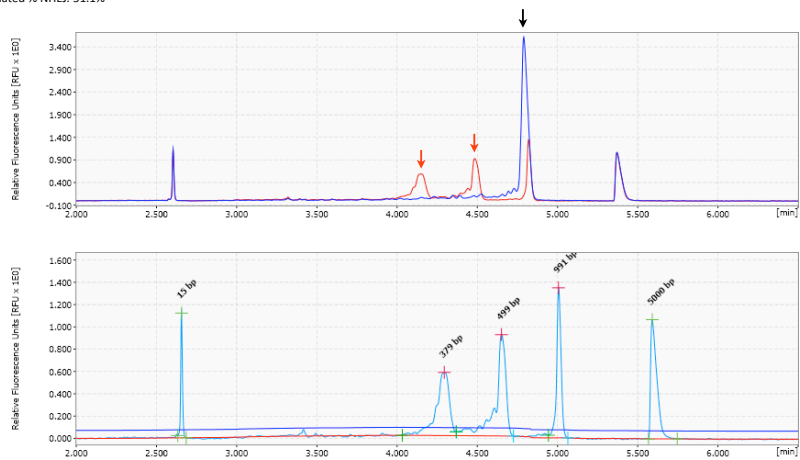

## MLH1

Expected cleavage peaks: 247 bp, 299 bp  
Observed cleavage peaks: 240 bp, 296 bp  
Fraction cleaved: 76.2%  
Estimated % NHEJ: 51.2%

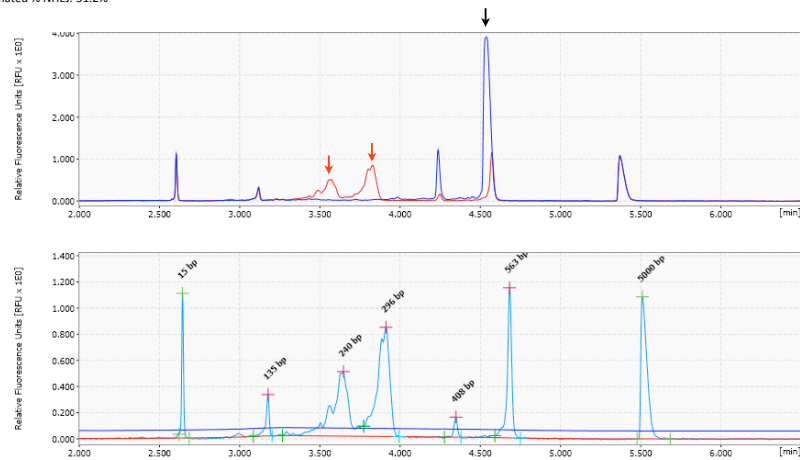

## MSH2

Expected cleavage peaks: 269 bp, 301 bp  
Observed cleavage peaks: 270 bp, 305 bp  
Fraction cleaved: 61.5%  
Estimated % NHEJ: 38.0%

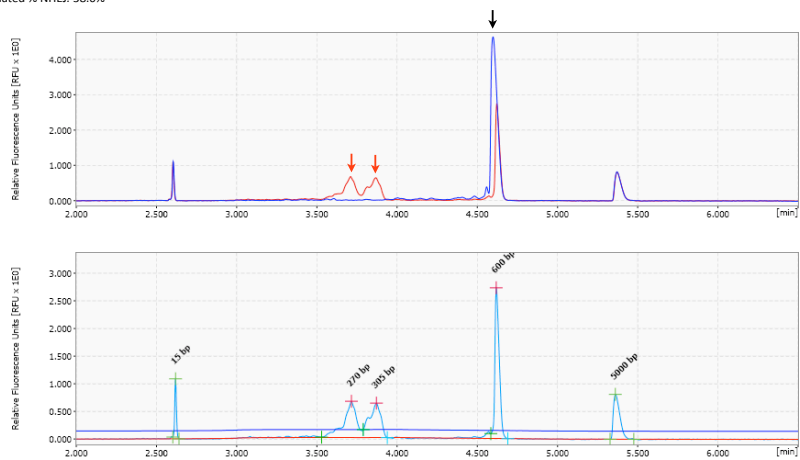

## MUTYH

Expected cleavage peaks: 246 bp, 332 bp  
Observed cleavage peaks: 244 bp, 328 bp  
Fraction cleaved: 30.2%  
Estimated % NHEJ: 16.5%

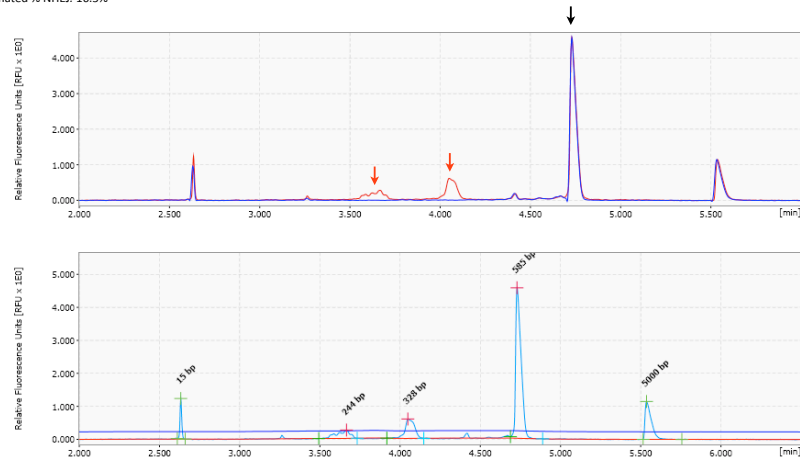

## MYC

Expected cleavage peaks: 260 bp, 295 bp  
Observed cleavage peaks: 261 bp, 290 bp  
Fraction cleaved: 17.8%  
Estimated % NHEJ: 9.5%

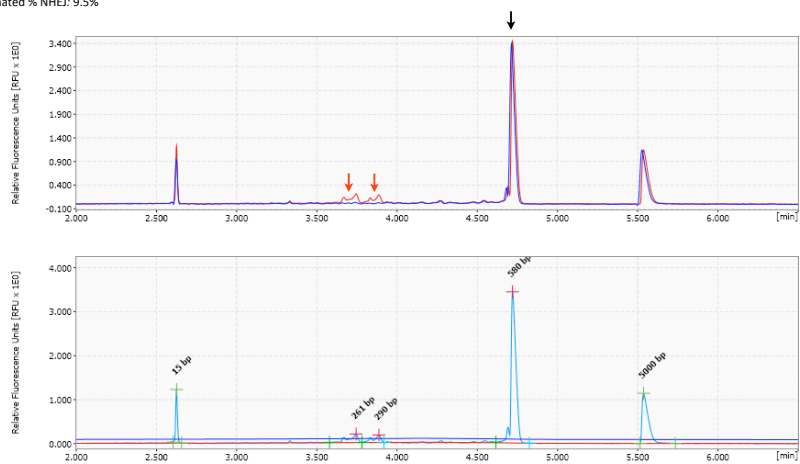

## MYCL1

Expected cleavage peaks: 235 bp, 320 bp  
Observed cleavage peaks: 229 bp, 324 bp  
Fraction cleaved: 32.6%  
Estimated % NHEJ: 17.9%

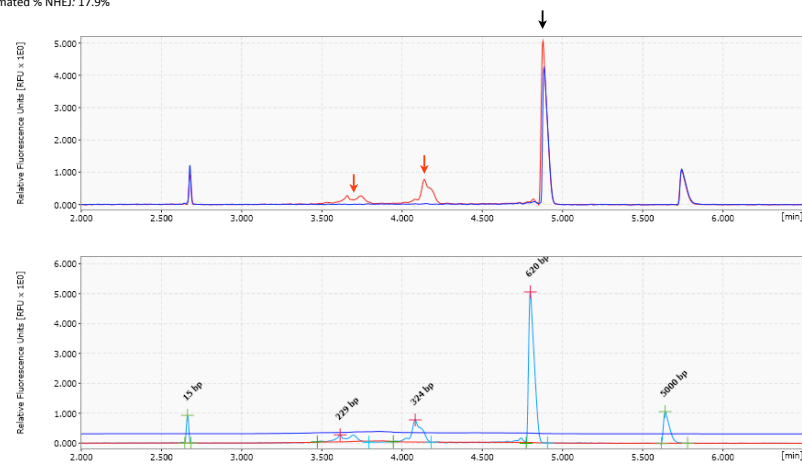

## MYCN

Expected cleavage peaks: 270 bp, 306 bp  
Observed cleavage peaks: 272 bp, 308 bp  
Fraction cleaved: 48.1%  
Estimated % NHEJ: 27.9%

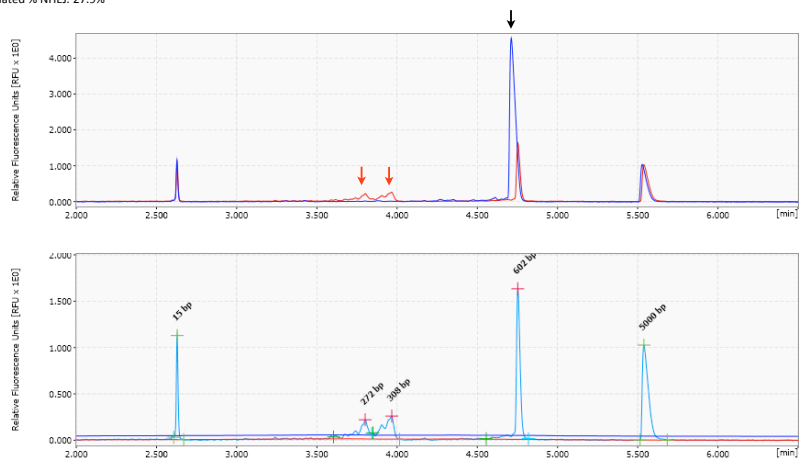

## NBN

Expected cleavage peaks: 272 bp, 399 bp  
Observed cleavage peaks: 267 bp, 411 bp  
Fraction cleaved: 85.4%  
Estimated % NHEJ: 61.8%

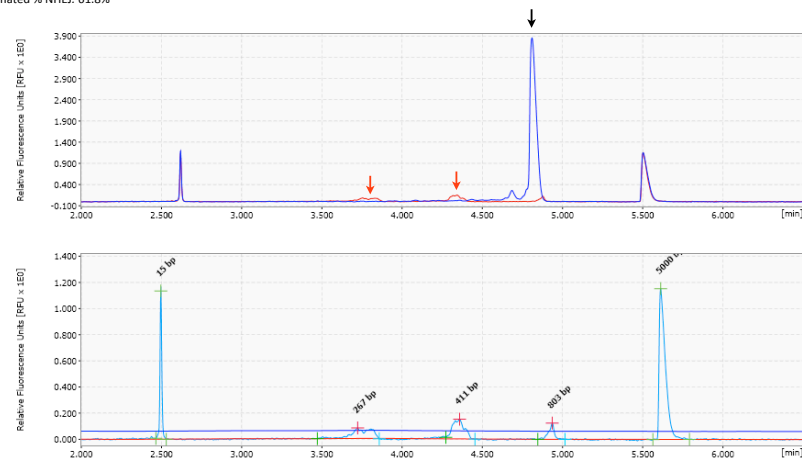



## NCOR1

Expected cleavage peaks: 241 bp, 486 bp  
Observed cleavage peaks: 241 bp, 487 bp  
Fraction cleaved: 67.2%  
Estimated % NHEJ: 42.7%

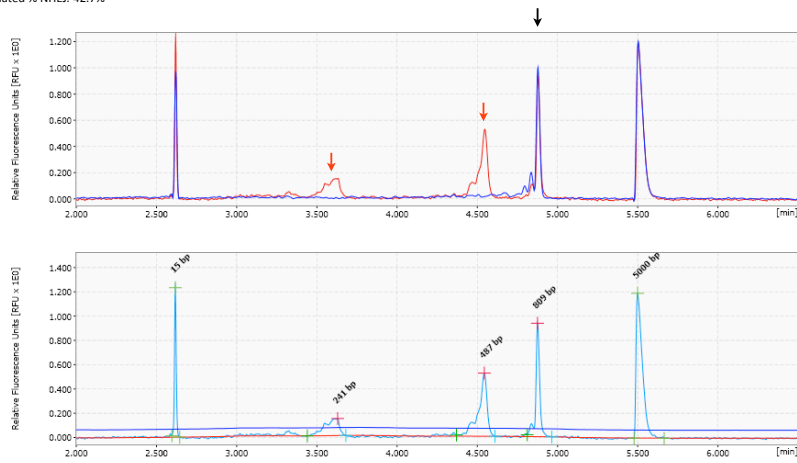

## NCOR2

Expected cleavage peaks: 212 bp, 372 bp  
Observed cleavage peaks: 200 bp, 377 bp  
Fraction cleaved: 7.6%  
Estimated % NHEJ: 3.9%

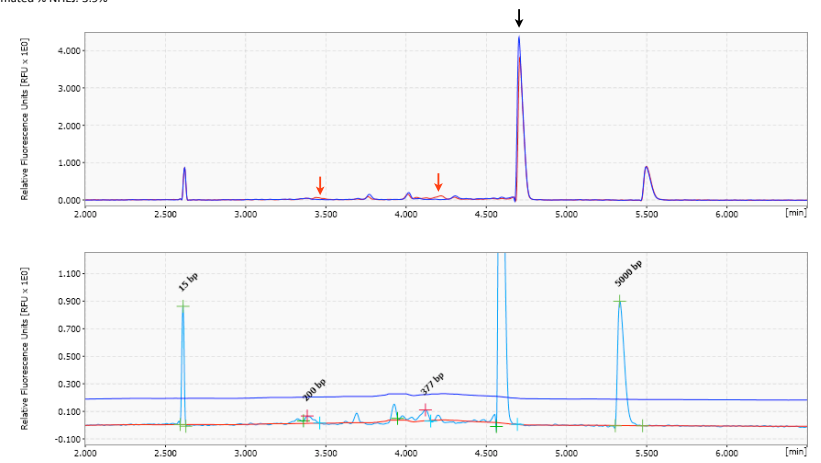

## NTRK1

Expected cleavage peaks: 258 bp, 309 bp  
Observed cleavage peaks: none

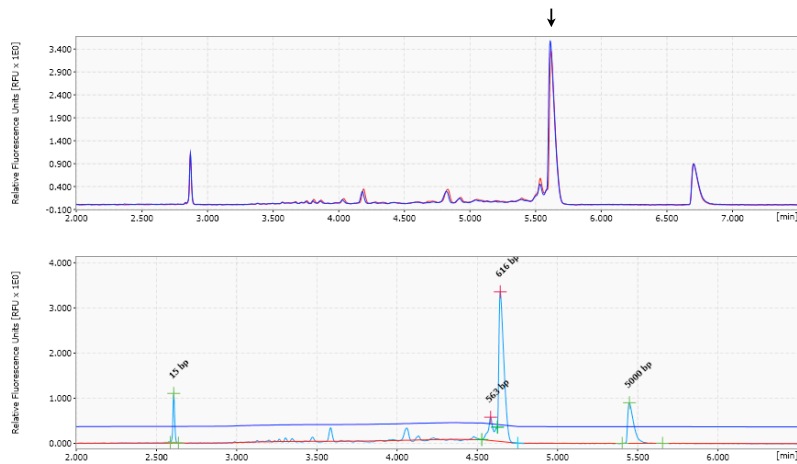

## PDGFRA

Expected cleavage peaks: 321 bp, 349 bp  
Observed cleavage peaks: 336 bp, 366 bp  
Fraction cleaved: 21.9%  
Estimated % NHEJ: 11.6%

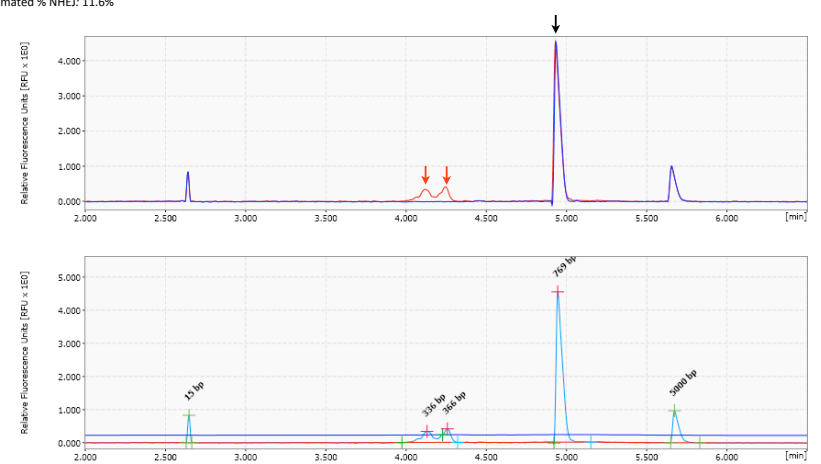

## PDGFRB

Expected cleavage peaks: 300 bp, 501 bp  
Observed cleavage peaks: 299 bp, 505 bp  
Fraction cleaved: 23.9%  
Estimated % NHEJ: 12.8%

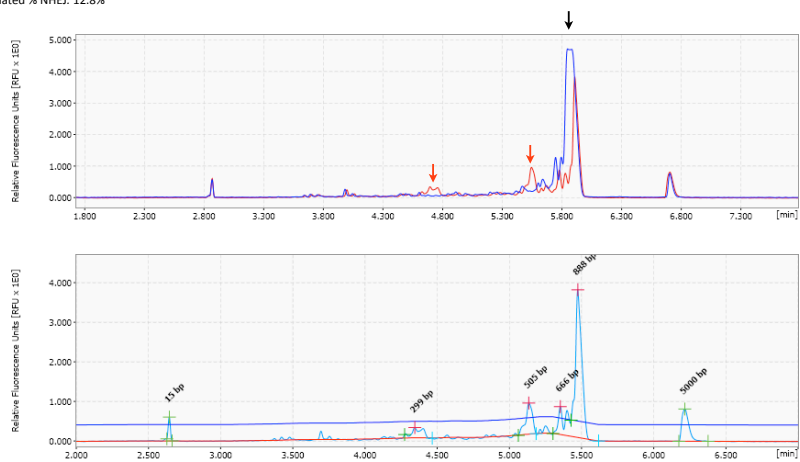

## PHF8

Expected cleavage peaks: 177 bp, 428 bp  
Observed cleavage peaks: 180 bp, 440 bp  
Fraction cleaved: 48.5%  
Estimated % NHEJ: 28.2%

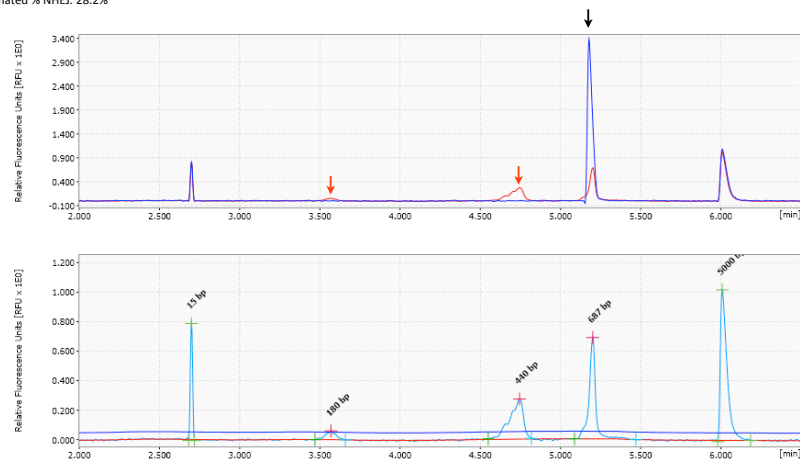

## PMS2

Expected cleavage peaks: 307 bp, 367 bp  
Observed cleavage peaks: 308 bp, 370 bp  
Fraction cleaved: 59.5%  
Estimated % NHEJ: 36.4%

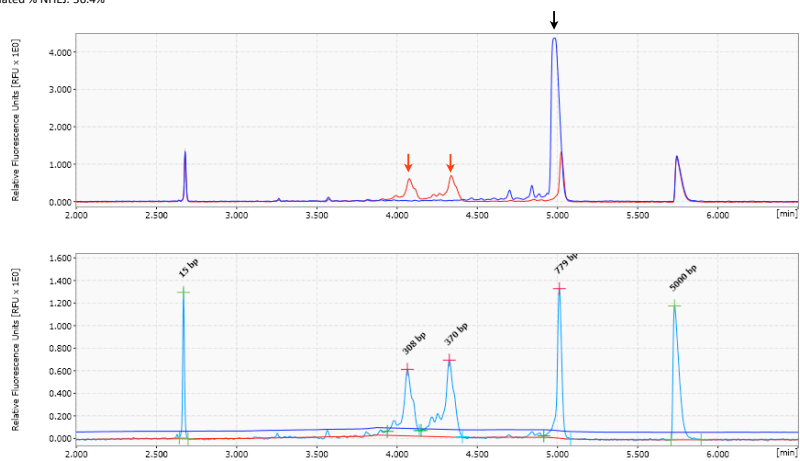

## PTCH1

Expected cleavage peaks: 324 bp, 335 bp  
Observed cleavage peaks: 331 bp  
Fraction cleaved: 21.9%  
Estimated % NHEJ: 11.6%

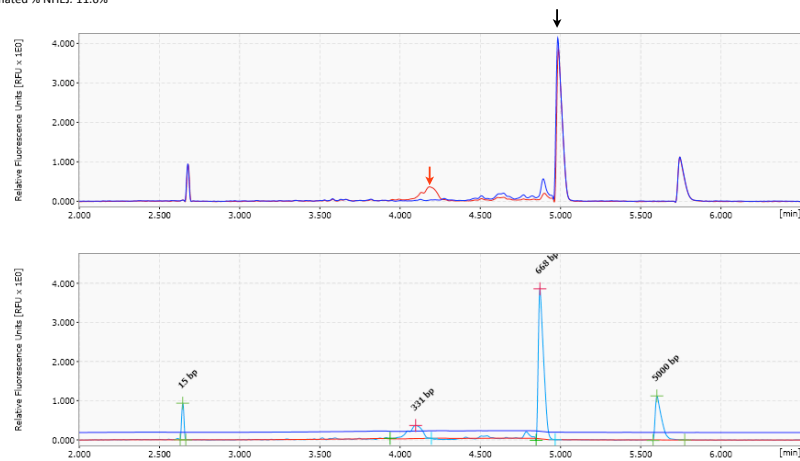

## PTEN

Expected cleavage peaks: 233 bp, 320 bp  
Observed cleavage peaks: 227 bp, 311 bp  
Fraction cleaved: 67.8%  
Estimated % NHEJ: 43.2%

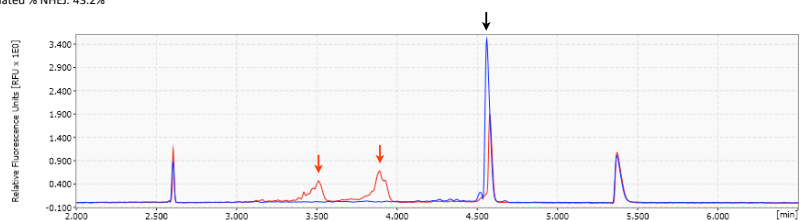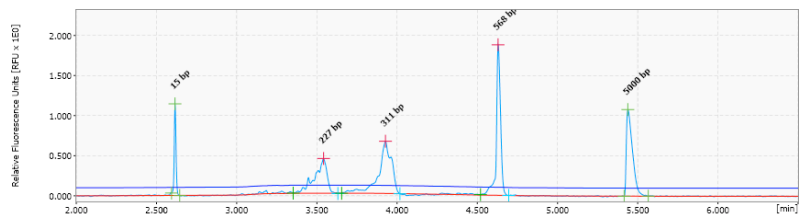

## RARA

Expected cleavage peaks: 285 bp, 289 bp  
Observed cleavage peaks: 274 bp, 290 bp  
Fraction cleaved: 14.0%  
Estimated % NHEJ: 7.3%

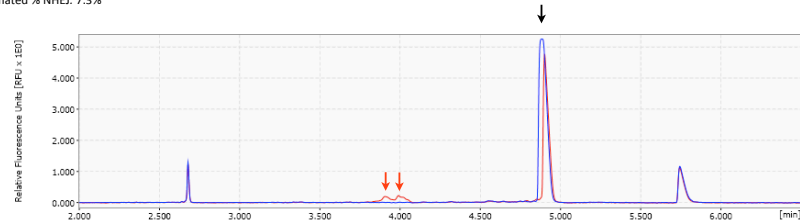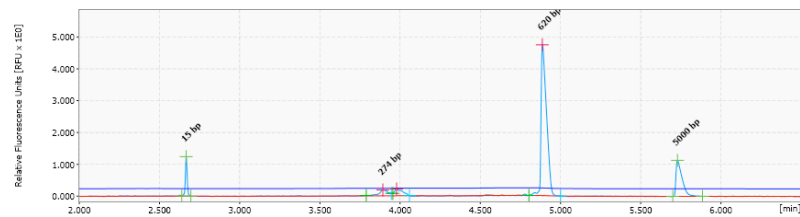

## RBBP5

Expected cleavage peaks: 203 bp, 370 bp  
Observed cleavage peaks: 208 bp, 372 bp  
Fraction cleaved: 44.0%  
Estimated % NHEJ: 25.2%

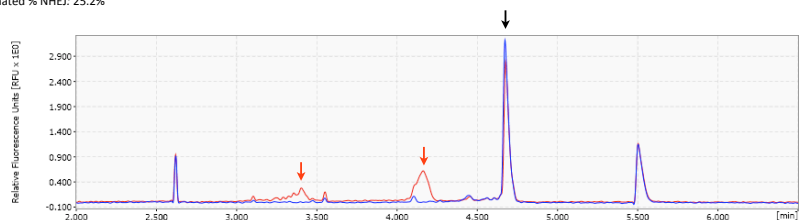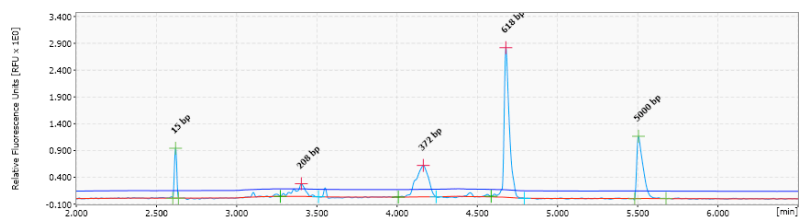

## RECQL4

Expected cleavage peaks: 339 bp, 477 bp  
Observed cleavage peaks: 357 bp, 506 bp  
Fraction cleaved: 11.4%  
Estimated % NHEJ: 5.9%

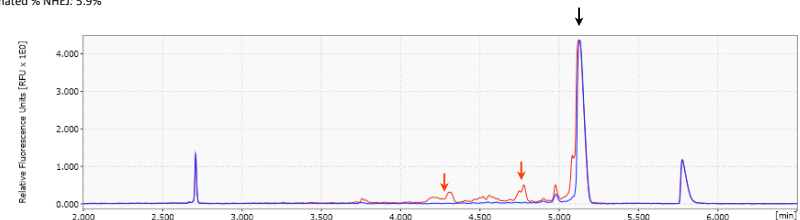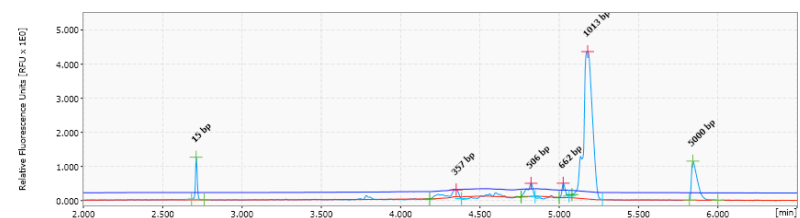

## REST

Expected cleavage peaks: 269 bp, 413 bp  
Observed cleavage peaks: *none*

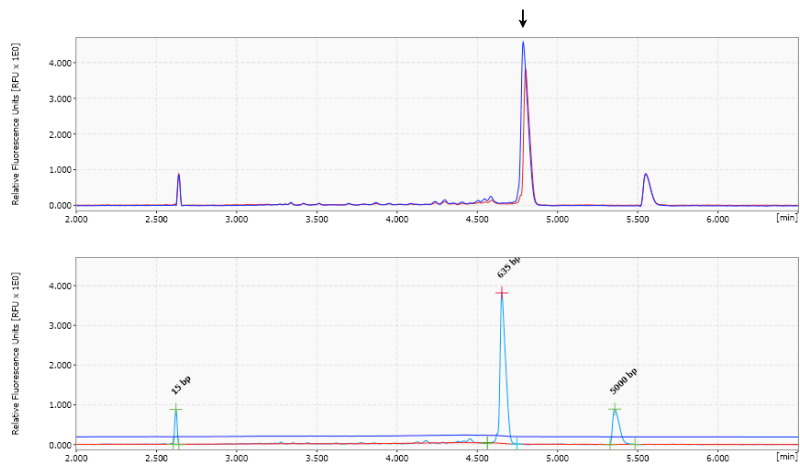

## RET

Expected cleavage peaks: 299 bp, 58 bp  
Observed cleavage peaks: 312 bp  
Fraction cleaved: 7.1%  
Estimated % NHEJ: 3.6%

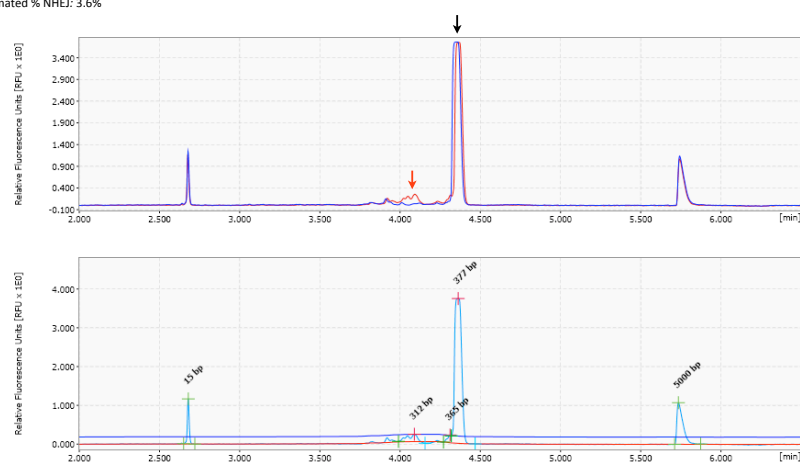

## RNF2

Expected cleavage peaks: 213 bp, 429 bp  
Observed cleavage peaks: *none*

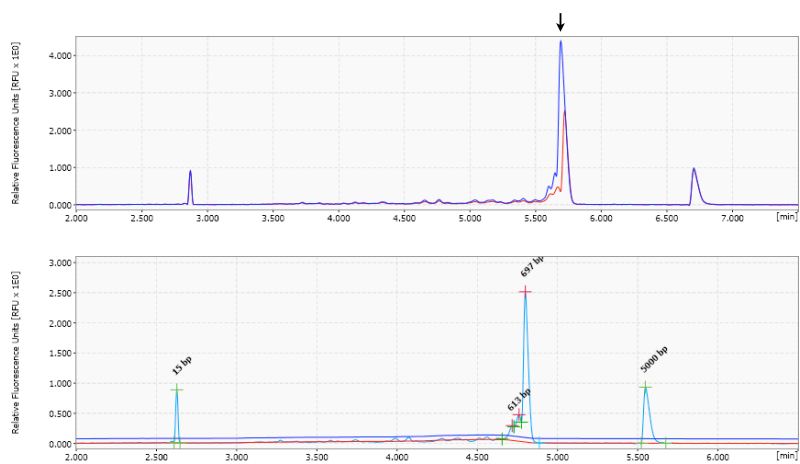

## RUNX1

Expected cleavage peaks: 249 bp, 318 bp  
Observed cleavage peaks: 232 bp, 331 bp  
Fraction cleaved: 33.1%  
Estimated % NHEJ: 18.2%

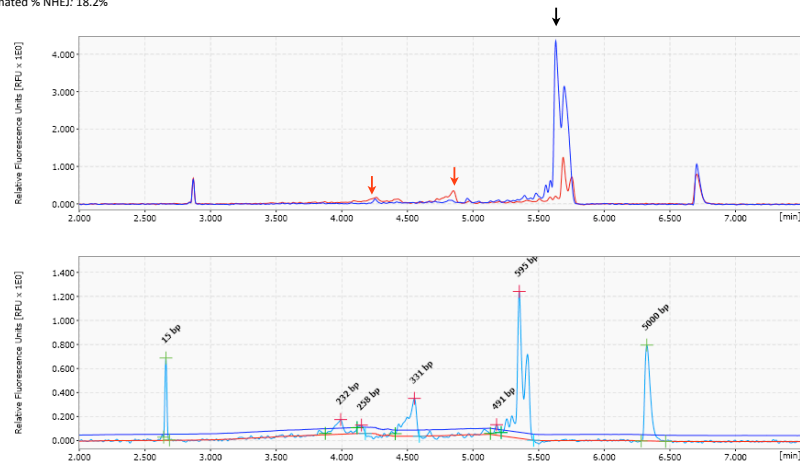

## SDHB

Expected cleavage peaks: 272 bp, 412 bp  
Observed cleavage peaks: 252 bp, 404 bp  
Fraction cleaved: 31.4%  
Estimated % NHEJ: 17.2%

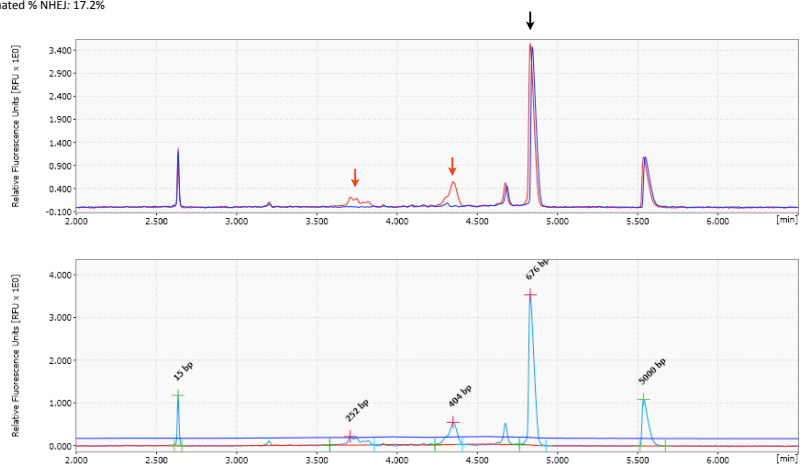

## SDHC

Expected cleavage peaks: 282 bp, 284 bp  
Observed cleavage peaks: 282 bp  
Fraction cleaved: 31.4%  
Estimated % NHEJ: 17.1%

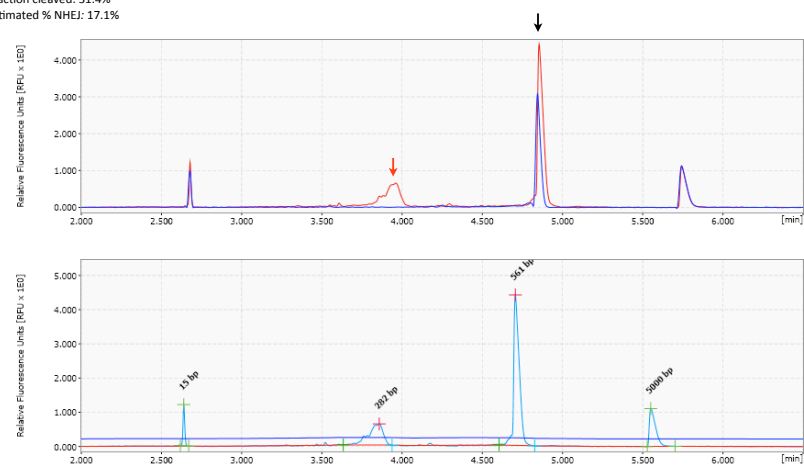

## SDHD

Expected cleavage peaks: 233 bp, 340 bp  
Observed cleavage peaks: 228 bp, 337 bp  
Fraction cleaved: 74.9%  
Estimated % NHEJ: 49.9%

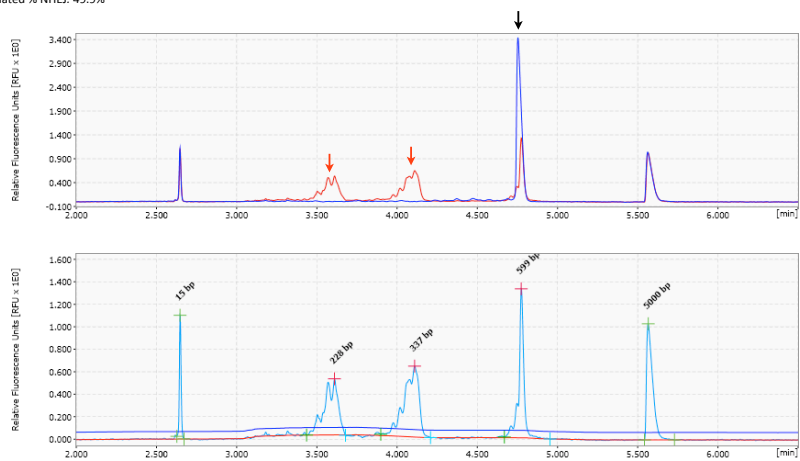

## SETDB1

Expected cleavage peaks: 213 bp, 223 bp  
Observed cleavage peaks: 210 bp, 219 bp  
Fraction cleaved: 63.6%  
Estimated % NHEJ: 39.6%

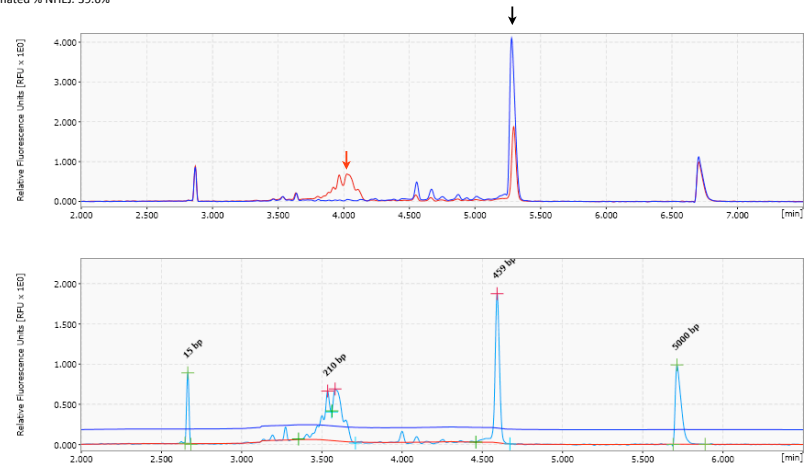

## SIRT6

Expected cleavage peaks: 213 bp, 363 bp  
Observed cleavage peaks: 221 bp, 360 bp  
Fraction cleaved: 71.3%  
Estimated % NHEJ: 46.4%

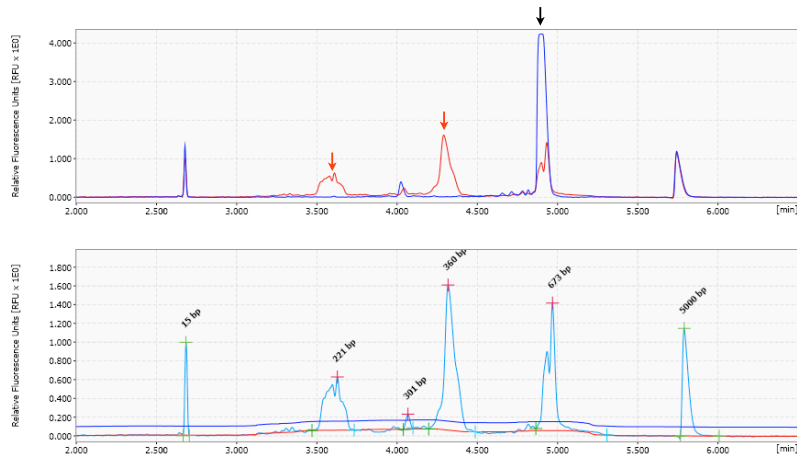

## SMAD2

Expected cleavage peaks: 281 bp, 302 bp  
Observed cleavage peaks: 286 bp, 310 bp  
Fraction cleaved: 4.6%  
Estimated % NHEJ: 2.3%

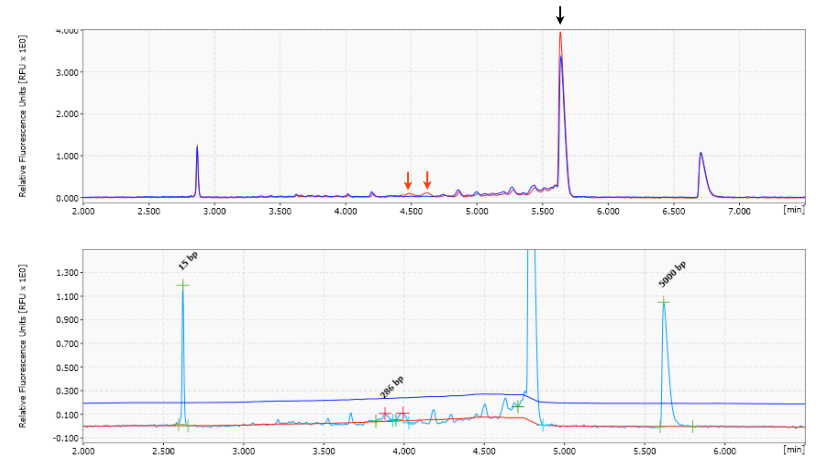

## SS18

Expected cleavage peaks: 245 bp, 326 bp  
Observed cleavage peaks: 258 bp, 333 bp  
Fraction cleaved: 41.5%  
Estimated % NHEJ: 23.5%

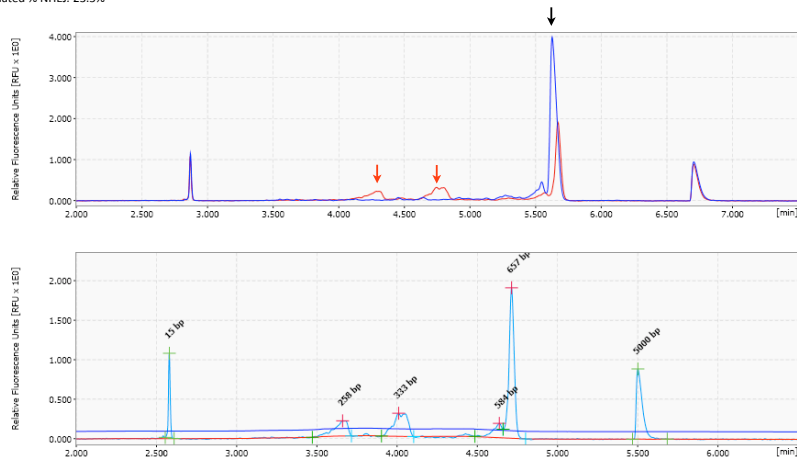

## SUZ12

Expected cleavage peaks: 194 bp, 456 bp  
Observed cleavage peaks: 207 bp, 470 bp  
Fraction cleaved: 25.2%  
Estimated % NHEJ: 13.5%

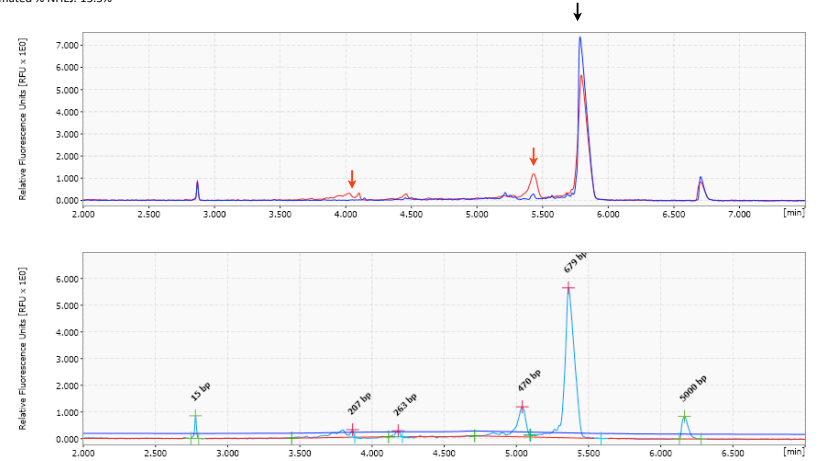

## TFE3

Expected cleavage peaks: 242 bp, 302 bp  
Observed cleavage peaks: 245 bp, 312 bp  
Fraction cleaved: 27.5%  
Estimated % NHEJ: 14.9%

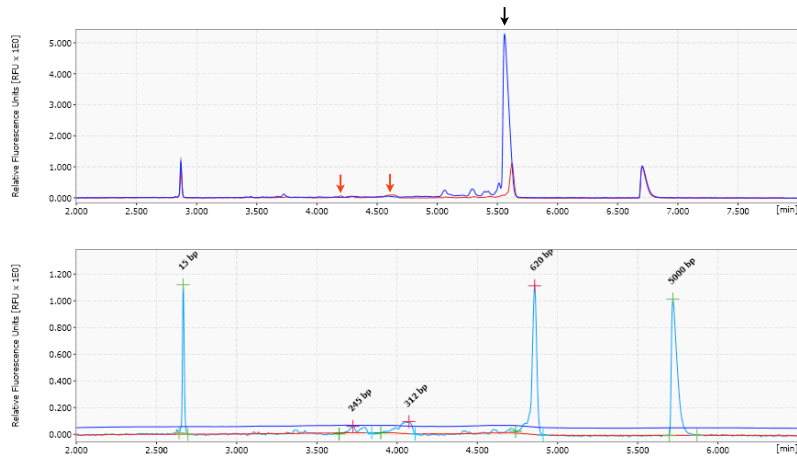

## TGFBR2

Expected cleavage peaks: 317 bp, 333 bp  
Observed cleavage peaks: none

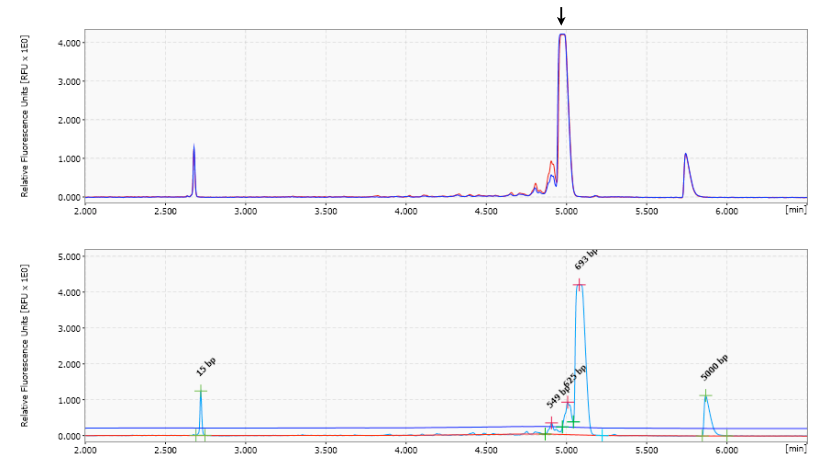

## TLX3

Expected cleavage peaks: 244 bp, 306 bp  
Observed cleavage peaks: none

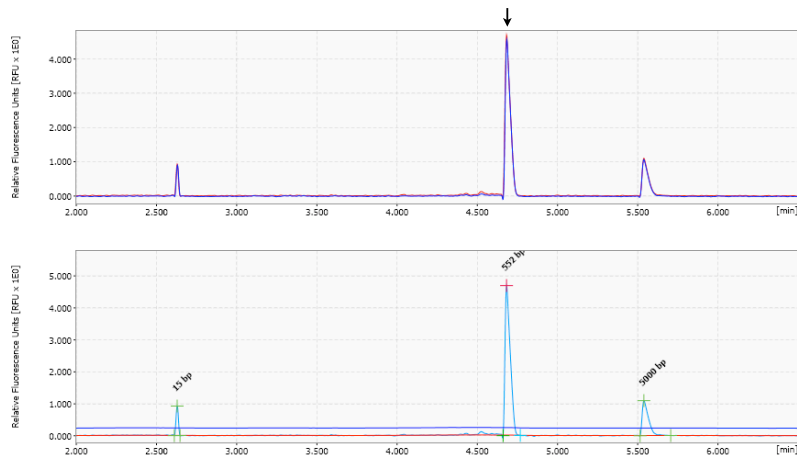

## TP53

Expected cleavage peaks: 227 bp, 348 bp  
Observed cleavage peaks: 213 bp, 354 bp  
Fraction cleaved: 29.9%  
Estimated % NHEJ: 16.3%

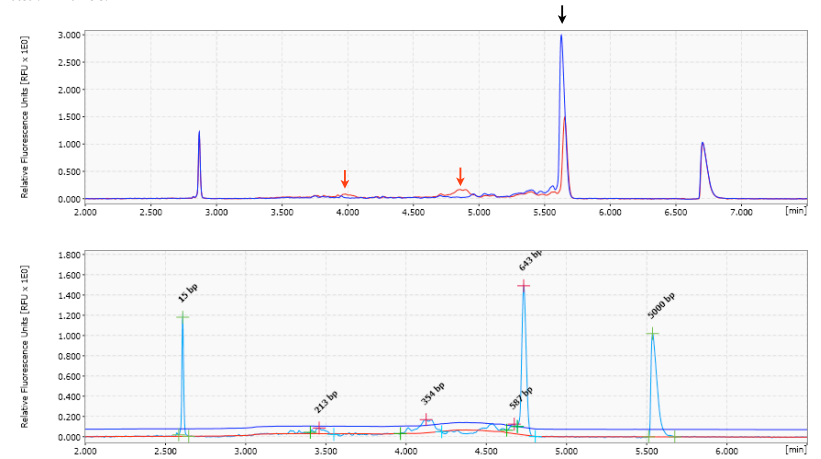

## TSC2

Expected cleavage peaks: 229 bp, 314 bp  
Observed cleavage peaks: 228 bp, 312 bp  
Fraction cleaved: 78.3%  
Estimated % NHEJ: 53.4%

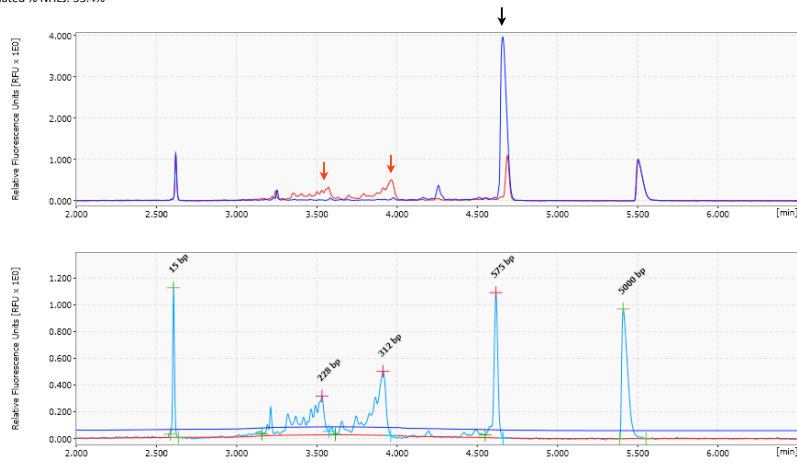

## VHL

Expected cleavage peaks: 240 bp, 330 bp  
Observed cleavage peaks: 225 bp, 336 bp  
Fraction cleaved: 36.7%  
Estimated % NHEJ: 21.4%

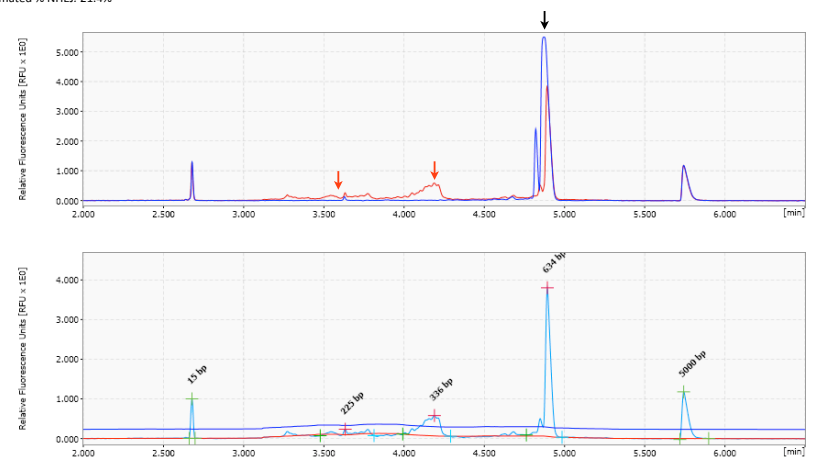

## XPA

Expected cleavage peaks: 250 bp, 300 bp  
Observed cleavage peaks: 250 bp, 298 bp  
Fraction cleaved: 28.0%  
Estimated % NHEJ: 15.1%

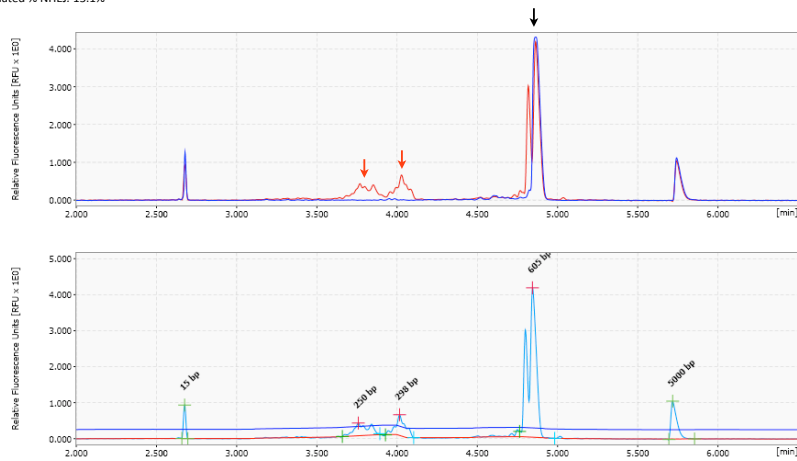

## XPC

Expected cleavage peaks: 249 bp, 304 bp  
Observed cleavage peaks: 248 bp, 294 bp  
Fraction cleaved: 46.9%  
Estimated % NHEJ: 27.1%

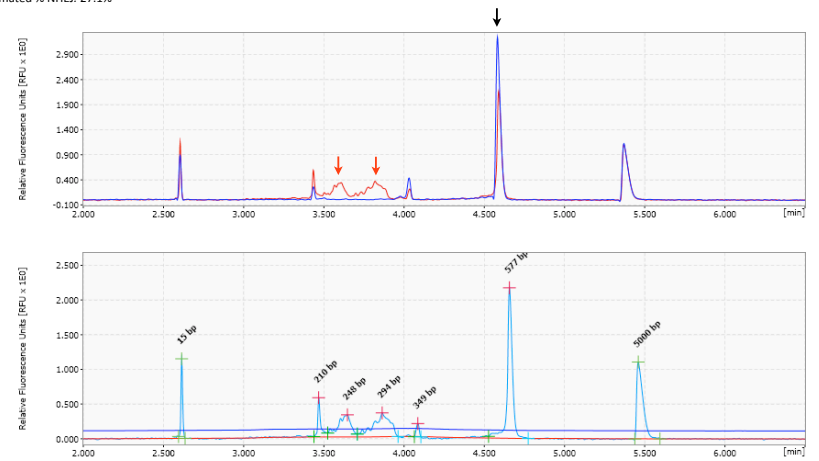

Supplement: NIHMS359665-supplement-2.pdf [file NIHMS359665-supplement-2.pdf]
